# Supplementary material for: Crucial lncRNAs associated with adipocyte differentiation from human adipose-derived stem cells based on co-expression and ceRNA network analyses
Source: PeerJ. 2019 Sep 6;7:e7544. doi: 10.7717/peerj.7544 (PMC6733242; doi:10.7717/peerj.7544)
Supplement: Supplemental Information 2 [file peerj-07-7544-s002.xlsx]

## Sheet: mRNA
	logFC	AveExpr	t	P.Value	adj.P.Val	B	change
PTPRB	-4.63422	3.08047	-5.24536	4.42615e-06	0.00172906	4.12552	DOWN
CRLF1	5.31171	8.85542	8.32423	1.55344e-10	1.75335e-06	13.4689	UP
ZBTB16	6.71487	7.09573	8.13299	2.8957e-10	1.75335e-06	12.9095	UP
COMP	6.29974	8.73842	7.9618	5.0713e-10	2.04711e-06	12.4049	UP
FOXO1	4.9795	7.90348	7.34851	3.85227e-09	1.16628e-05	10.5708	UP
LMO3	4.92091	9.44269	7.26129	5.15115e-09	1.24761e-05	10.3069	UP
KLF15	5.19021	8.05078	7.20062	6.30674e-09	1.27291e-05	10.123	UP
MT1G	4.70689	4.71489	6.90765	1.68046e-08	2.9072e-05	9.23097	UP
ARNT2	-5.33918	5.7492	-6.73391	3.01031e-08	4.19944e-05	8.69926	DOWN
NEFL	5.49925	6.66767	6.72316	3.12097e-08	4.19944e-05	8.6663	UP
NRCAM	4.84201	8.1684	6.5719	5.18866e-08	6.28346e-05	8.20203	UP
PCSK1	4.32417	5.39596	6.36287	1.04815e-07	0.000114664	7.559	UP
FRAS1	6.28637	6.23864	6.33889	1.13622e-07	0.000114664	7.48517	UP
PDK4	5.94504	7.53916	6.25671	1.4982e-07	0.000139563	7.23198	UP
FGF9	-4.23574	1.75514	-6.07268	2.78248e-07	0.00023422	6.6648	DOWN
IL6	-5.81939	3.91301	-6.06026	2.90116e-07	0.00023422	6.62652	DOWN
PER1	3.89756	8.29236	6.02589	3.25653e-07	0.000246479	6.52059	UP
IL18R1	4.59514	6.28273	5.91882	4.66686e-07	0.000309799	6.19063	UP
MT1X	3.59614	8.01487	5.91287	4.76104e-07	0.000309799	6.1723	UP
MT1M	3.81984	6.71084	5.90671	4.8606e-07	0.000309799	6.15332	UP
PDE4D	4.06424	9.04274	5.68389	1.02622e-06	0.000621374	5.4676	UP
SERPINA3	4.91233	5.59361	5.55003	1.60575e-06	0.000901497	5.05658	UP
RASD1	4.45684	7.96196	5.53722	1.67593e-06	0.000901497	5.01731	UP
IL1RL1	5.90533	8.08207	5.53081	1.71217e-06	0.000901497	4.99766	UP
OXTR	-5.64038	4.96487	-5.47559	2.05866e-06	0.00103877	4.82845	DOWN
GALNT15	4.46108	7.94728	5.45077	2.2362e-06	0.00108321	4.75249	UP
FKBP5	3.41735	10.83	5.43354	2.36835e-06	0.0011031	4.69976	UP
RTKN2	-4.16451	2.2977	-5.38046	2.82613e-06	0.00126757	4.53749	DOWN
ELOVL3	3.93634	4.68396	5.36778	2.94788e-06	0.00127496	4.49876	UP
HSD11B1	3.63081	8.25128	5.32617	3.3852e-06	0.00141361	4.37173	UP
FLVCR2	3.58277	5.30757	5.29595	3.74256e-06	0.00151075	4.27957	UP
CACNA1G	3.59797	6.19446	5.19476	5.23356e-06	0.00195276	3.97165	UP
TSC22D3	3.36405	10.6181	5.18974	5.32132e-06	0.00195276	3.95638	UP
SHROOM3	-3.3745	5.35029	-5.09542	7.26627e-06	0.00258807	3.67035	DOWN
RGS4	-3.2801	6.47602	-5.06263	8.09528e-06	0.00276128	3.57116	DOWN
PRG4	4.71057	8.14694	5.05841	8.20859e-06	0.00276128	3.5584	UP
ARHGEF28	-3.39153	5.32761	-4.97514	1.07932e-05	0.00347183	3.30712	DOWN
SH3RF3	3.12992	7.19822	4.9723	1.08943e-05	0.00347183	3.29857	UP
NPR1	3.77251	6.39766	4.88369	1.45626e-05	0.00442295	3.03224	UP
GPR68	-3.67137	4.04163	-4.88271	1.46093e-05	0.00442295	3.0293	DOWN
RERG	3.61208	5.36029	4.87352	1.50543e-05	0.00444652	3.00177	UP
VCAM1	-4.2994	3.80045	-4.85657	1.59113e-05	0.00458777	2.95097	DOWN
SORBS1	3.38109	4.11006	4.83439	1.71056e-05	0.00481742	2.88457	UP
ATP8B1	-3.5075	7.0424	-4.81826	1.8029e-05	0.00496207	2.83634	DOWN
DUSP4	4.98492	5.1541	4.80228	1.89923e-05	0.00510502	2.7886	UP
CYP19A1	3.51634	6.46869	4.79589	1.93915e-05	0.00510502	2.76952	UP
ARHGEF26	3.299	5.04164	4.78167	2.03098e-05	0.00523302	2.72708	UP
CNIH3	-3.42264	2.48401	-4.70415	2.61218e-05	0.00659032	2.49631	DOWN
ZSWIM4	-3.1745	4.9286	-4.69774	2.66704e-05	0.0065914	2.47726	DOWN
ADAMTS15	3.31728	9.67727	4.67383	2.88156e-05	0.00697913	2.40634	UP
SYBU	3.79868	6.32653	4.62827	3.33844e-05	0.00780518	2.27146	UP
EPHA2	-3.36407	4.69503	-4.62706	3.35152e-05	0.00780518	2.26787	DOWN
CDCP1	-4.48398	3.87187	-4.57768	3.92943e-05	0.00897839	2.12212	DOWN
FRMD5	-3.14468	4.50517	-4.54621	4.3476e-05	0.00969374	2.0295	DOWN
NR3C2	-2.88372	4.64221	-4.5423	4.40261e-05	0.00969374	2.01798	DOWN
RASL11B	3.11399	5.61719	4.52881	4.59735e-05	0.00994178	1.97835	UP
GREM2	-3.47669	5.41991	-4.50825	4.91039e-05	0.0101427	1.91803	DOWN
CEMIP	-4.83755	8.91657	-4.50747	4.9228e-05	0.0101427	1.91572	DOWN
AOC2	3.70406	3.8792	4.50628	4.94154e-05	0.0101427	1.91224	UP
ROR2	4.19705	6.14024	4.458	5.76653e-05	0.0116388	1.77091	UP
SIX2	3.16853	4.8366	4.42461	6.41447e-05	0.0127343	1.67347	UP
EDNRB	4.069	8.32138	4.41339	6.64778e-05	0.012918	1.64079	UP
RAB40A	2.90163	2.91803	4.40596	6.80687e-05	0.012918	1.61915	UP
SMOC1	3.19598	5.74828	4.40503	6.82703e-05	0.012918	1.61645	UP
APOD	4.74618	7.11612	4.38457	7.28584e-05	0.0135741	1.55696	UP
MAOA	5.1824	7.73511	4.37857	7.42619e-05	0.0136259	1.53951	UP
RGCC	3.04366	6.82887	4.36077	7.85766e-05	0.0141295	1.48786	UP
BIRC3	-3.21088	4.48811	-4.35322	8.04794e-05	0.0141295	1.46599	DOWN
APLN	3.16212	6.12374	4.35312	8.05066e-05	0.0141295	1.46568	UP
DIRAS3	3.08762	4.3655	4.33244	8.59552e-05	0.0148702	1.40581	UP
RBM24	-3.27536	3.32349	-4.30762	9.29756e-05	0.0158582	1.33405	DOWN
SPON1	4.16175	7.76248	4.2987	9.56307e-05	0.0160846	1.30832	UP
SOX7	2.78317	2.31931	4.26517	0.000106298	0.0176339	1.2117	UP
KY	-3.19872	2.96368	-4.25975	0.000108128	0.017695	1.19611	DOWN
CCDC69	4.20318	8.11946	4.224	0.000120992	0.0192625	1.09346	UP
NUAK2	-2.92916	4.29398	-4.22269	0.000121488	0.0192625	1.08972	DOWN
EPHB6	3.86653	4.38307	4.22011	0.000122478	0.0192625	1.08231	UP
ANGPTL4	3.46271	7.1112	4.21368	0.000124972	0.0194027	1.06391	UP
FGF1	-4.51395	3.5195	-4.20917	0.000126753	0.0194302	1.05099	DOWN
SLC4A4	-3.14599	5.57752	-4.178	0.000139751	0.0211549	0.961891	DOWN
SLC19A3	3.74329	3.11941	4.17356	0.000141708	0.0211863	0.949203	UP
NRG1	-3.34639	5.06893	-4.16443	0.000145808	0.0215333	0.923181	DOWN
KCNJ15	-3.35886	4.67977	-4.15289	0.000151161	0.0220549	0.890287	DOWN
RIPOR2	3.08824	5.52698	4.13304	0.000160815	0.0231842	0.833819	UP
CACNB4	-2.99343	3.94861	-4.10749	0.000174133	0.0248088	0.76127	DOWN
IGF1	3.17424	8.13026	4.10216	0.000177039	0.0249296	0.746181	UP
IRF4	4.31885	4.09904	4.08886	0.000184508	0.0256827	0.708515	UP
MAP3K7CL	-4.00859	4.78952	-4.06988	0.000195703	0.0268682	0.654833	DOWN
PID1	2.61395	9.1407	4.06699	0.000197463	0.0268682	0.646677	UP
FGF12	3.18946	5.40381	4.03029	0.000221204	0.0296604	0.543256	UP
PARM1	3.69069	4.86806	4.02644	0.000223855	0.0296604	0.532405	UP
G0S2	2.76164	8.47268	4.02431	0.000225331	0.0296604	0.526424	UP
PLXNA4	4.41259	7.42308	4.00385	0.000240008	0.0312527	0.468969	UP
ADRA1B	2.92945	3.73369	3.99312	0.000248075	0.0319594	0.438881	UP
BMF	-3.60291	3.87219	-3.98199	0.00025672	0.0327251	0.407703	DOWN
HR	-3.11234	4.07156	-3.97396	0.000263138	0.0331937	0.385236	DOWN
HTR1F	-2.75704	3.16264	-3.94715	0.000285706	0.035669	0.310383	DOWN
SERPINB7	-4.77233	4.52383	-3.94017	0.000291879	0.0360679	0.290941	DOWN
TBXAS1	2.73612	3.2801	3.92532	0.000305456	0.0373643	0.249601	UP
MRO	2.91782	5.09248	3.92134	0.000309193	0.0374433	0.238545	UP
FMN1	-2.5639	6.06053	-3.91085	0.00031927	0.0382464	0.20939	DOWN
ANGPT2	-3.07826	3.33138	-3.9067	0.000323342	0.0382464	0.197873	DOWN
ACACB	4.2928	7.72004	3.90109	0.000328926	0.0382464	0.182311	UP
IL17RE	3.84255	3.70213	3.89962	0.000330408	0.0382464	0.178225	UP
PTGIR	-2.95372	4.70654	-3.89842	0.000331616	0.0382464	0.174907	DOWN
SERPINB2	-4.07066	5.17019	-3.88541	0.000345041	0.0394193	0.138849	DOWN
FGF5	-2.44814	7.34586	-3.87729	0.000353681	0.0396372	0.116379	DOWN
ACKR3	2.91957	5.81041	3.87466	0.000356526	0.0396372	0.109101	UP
SPRED3	-2.64083	3.99868	-3.87169	0.000359761	0.0396372	0.100897	DOWN
RCAN2	-3.37752	3.44914	-3.87002	0.000361596	0.0396372	0.096276	DOWN
HTRA3	2.77279	8.03213	3.86846	0.000363314	0.0396372	0.0919712	UP
GCNT2	-2.99593	2.53103	-3.85966	0.000373163	0.0399978	0.0676787	DOWN
ITPR1	3.21646	6.70258	3.85696	0.000376239	0.0399978	0.0602232	UP
TNIP3	-2.79351	1.66071	-3.85671	0.000376528	0.0399978	0.059526	DOWN
AKR1C2	2.58862	7.7847	3.85356	0.000380142	0.0400306	0.0508512	UP
BTBD11	2.6444	5.78863	3.83761	0.000398997	0.0416485	0.0068998	UP
TNFRSF11B	-2.67082	8.09014	-3.83483	0.000402384	0.0416485	-0.000772689	DOWN
SCG5	-3.2088	3.02911	-3.81211	0.000431035	0.0442359	-0.0631958	DOWN
PTGES	2.74818	8.24078	3.79927	0.000448102	0.045601	-0.0984242	UP
DDIT4L	-2.6401	3.47096	-3.79488	0.000454075	0.0458238	-0.110436	DOWN
RASSF4	2.60604	8.15025	3.76508	0.000496752	0.0497163	-0.19189	UP
MAP2	2.54682	8.87921	3.75333	0.000514625	0.0510829	-0.22393	UP
KIAA1755	-2.74265	5.13352	-3.73557	0.000542812	0.0534427	-0.272248	DOWN
RGL3	2.66048	2.21707	3.72324	0.000563261	0.0550088	-0.305746	UP
FGL2	2.64909	3.00006	3.7204	0.000568074	0.055035	-0.313453	UP
PIK3R1	2.41722	10.7404	3.7091	0.000587623	0.0559884	-0.344092	UP
PC	2.48255	8.31922	3.70856	0.00058857	0.0559884	-0.34555	UP
ZNF365	-3.36105	3.84715	-3.70674	0.000591785	0.0559884	-0.350483	DOWN
TCF7	-3.84805	4.17603	-3.69485	0.000613181	0.057563	-0.382637	DOWN
CARD10	-2.67854	4.38984	-3.69038	0.000621428	0.0576657	-0.394729	DOWN
CH25H	-2.74521	5.58046	-3.6891	0.000623799	0.0576657	-0.398177	DOWN
SAMD12	-2.96932	2.69326	-3.68234	0.000636507	0.0583947	-0.416428	DOWN
RAB3B	-3.46811	7.17658	-3.67139	0.000657643	0.0598801	-0.445986	DOWN
ID1	3.06234	6.92939	3.64106	0.000719697	0.0650413	-0.527537	UP
NOG	2.72844	6.08838	3.63641	0.000729703	0.0653412	-0.540019	UP
CHST2	2.50674	7.61524	3.63364	0.000735718	0.0653412	-0.547441	UP
GPX3	3.12286	9.7117	3.63205	0.000739202	0.0653412	-0.551712	UP
IL16	2.74165	6.93316	3.62376	0.000757598	0.066482	-0.57393	UP
PEX5L	2.92248	3.9354	3.60531	0.000800095	0.0697061	-0.623245	UP
ADORA1	-2.7704	1.99869	-3.57946	0.000863535	0.0746958	-0.692155	DOWN
ANKRD1	-2.57795	5.49855	-3.57196	0.000882822	0.0758225	-0.712096	DOWN
GBP4	-2.55034	4.31737	-3.55936	0.000916168	0.0777408	-0.745558	DOWN
ERRFI1	2.27289	9.84555	3.55868	0.000917997	0.0777408	-0.747357	UP
ITGA3	-2.99366	6.31676	-3.54966	0.00094266	0.0792751	-0.771279	DOWN
TMEM130	-3.84957	3.66444	-3.53192	0.000993003	0.0827315	-0.818206	DOWN
RSPO3	-2.82344	3.9577	-3.52748	0.00100601	0.0827315	-0.829939	DOWN
GCSAM	-2.39769	1.31661	-3.52656	0.00100873	0.0827315	-0.832374	DOWN
ICAM1	-2.24918	7.58825	-3.52576	0.00101109	0.0827315	-0.834479	DOWN
CAP2	-2.92282	5.85139	-3.52057	0.00102656	0.0831694	-0.848172	DOWN
SAT1	2.20686	8.96645	3.51937	0.00103017	0.0831694	-0.85134	UP
LOXL4	-2.82674	7.30517	-3.51607	0.00104016	0.0834191	-0.860032	DOWN
SLC7A8	2.3331	9.34908	3.50229	0.00108288	0.0853275	-0.896312	UP
GRHL1	-2.34277	2.95137	-3.50198	0.00108388	0.0853275	-0.897142	DOWN
KCND2	-2.3646	5.70917	-3.50159	0.00108509	0.0853275	-0.898147	DOWN
DDIT4	2.46028	9.66892	3.48365	0.00114338	0.089331	-0.945284	UP
FRMPD4	-2.67686	6.22897	-3.47833	0.00116122	0.0901437	-0.959231	DOWN
ARSI	-3.2649	4.43954	-3.4754	0.00117116	0.0903356	-0.9669	DOWN
RNF144B	-2.33562	4.71883	-3.4705	0.00118796	0.0910517	-0.979725	DOWN
INS-IGF2	2.63255	3.59747	3.46731	0.00119904	0.0913228	-0.988082	UP
C11orf87	2.89607	5.72807	3.46218	0.00121705	0.0919072	-1.00151	UP
LPXN	-2.91016	6.63838	-3.46081	0.00122189	0.0919072	-1.00508	DOWN
BCL2L11	2.33357	7.6278	3.45795	0.00123208	0.0921019	-1.01255	UP
MOB3B	2.54782	4.28415	3.44564	0.00127685	0.0948626	-1.04467	UP
DUSP1	2.38423	9.49587	3.43156	0.00132999	0.0982081	-1.08135	UP
METTL7A	2.80444	8.80277	3.42839	0.00134223	0.0982999	-1.08959	UP
ADORA2A	-2.24657	4.42978	-3.427	0.00134765	0.0982999	-1.09321	DOWN
IL32	-3.72149	4.38928	-3.42462	0.00135694	0.0982999	-1.09939	DOWN
TMEM100	2.30529	5.00604	3.4229	0.0013637	0.0982999	-1.10386	UP
IGF2	2.5707	3.54592	3.41843	0.00138143	0.0989891	-1.11547	UP
RAB27B	-2.85397	3.61657	-3.41244	0.00140553	0.100123	-1.13102	DOWN
ABAT	2.8449	5.66323	3.4001	0.00145643	0.103142	-1.16299	UP
PLK2	-2.27889	6.7118	-3.3846	0.00152283	0.107218	-1.20304	DOWN
GUCA1B	2.48387	2.06989	3.37644	0.00155898	0.108841	-1.22411	UP
RNF144A	2.19481	9.28219	3.37535	0.00156386	0.108841	-1.22692	UP
ST6GALNAC3	2.57507	5.23085	3.37239	0.0015772	0.109142	-1.23454	UP
DRP2	-2.51387	4.74199	-3.3579	0.00164412	0.113126	-1.27184	DOWN
HAS1	3.53559	6.23125	3.3388	0.0017364	0.118801	-1.32084	UP
SFRP1	2.24911	9.56028	3.32332	0.00181483	0.12347	-1.36045	UP
PRAG1	-2.45531	3.97781	-3.31354	0.00186611	0.125584	-1.38542	DOWN
PRSS12	-2.92301	7.20345	-3.31343	0.00186667	0.125584	-1.3857	DOWN
PDE5A	-2.05501	7.45726	-3.31149	0.00187702	0.125584	-1.39065	DOWN
SEMA3A	-2.80949	3.74341	-3.29955	0.00194182	0.129206	-1.42106	DOWN
TNFSF9	-2.50488	2.99944	-3.27883	0.00205935	0.136277	-1.47369	DOWN
PPP1R13L	-2.36531	4.47905	-3.25245	0.0022188	0.146031	-1.54042	DOWN
TMEM59L	2.47568	5.643	3.24757	0.0022496	0.147257	-1.55275	UP
A2M	3.55558	4.46298	3.24532	0.00226386	0.147394	-1.5584	UP
ACSL1	2.0831	10.4446	3.24093	0.00229209	0.148399	-1.56948	UP
NTM	-3.11316	5.458	-3.23769	0.00231307	0.148399	-1.57763	DOWN
PGAM2	2.14307	3.57837	3.23694	0.00231794	0.148399	-1.57951	UP
GDF5	-2.0056	6.39831	-3.23536	0.0023283	0.148399	-1.58349	DOWN
MAMDC2	2.93107	4.89601	3.22166	0.00241973	0.153418	-1.61792	UP
PTGER4	-2.06798	3.61112	-3.2196	0.00243372	0.153502	-1.62307	DOWN
ARHGAP6	2.32252	6.73446	3.21757	0.00244763	0.153579	-1.62816	UP
EPOP	2.23604	4.97778	3.21371	0.00247431	0.154453	-1.63784	UP
CRISPLD2	2.058	11.5837	3.20931	0.00250502	0.155568	-1.64886	UP
TMEM132B	2.31696	2.4308	3.207	0.0025213	0.155781	-1.65465	UP
TNS3	-2.51119	8.23935	-3.20309	0.00254909	0.156698	-1.66443	DOWN
LHX9	-2.24477	4.26713	-3.20004	0.00257094	0.157243	-1.67206	DOWN
MGARP	-2.76577	3.50553	-3.18788	0.0026599	0.161095	-1.70242	DOWN
NR4A3	2.63758	5.4277	3.18624	0.00267207	0.161095	-1.7065	UP
HOXD1	-2.34732	2.8047	-3.18444	0.00268554	0.161095	-1.71098	DOWN
C6orf132	-2.29306	5.80542	-3.18423	0.00268713	0.161095	-1.71151	DOWN
DACT1	-2.17452	6.75666	-3.17932	0.00272424	0.162515	-1.72375	DOWN
KIRREL3	-3.28218	4.83774	-3.17681	0.00274336	0.162838	-1.72999	DOWN
CCDC9B	-2.15099	6.27268	-3.1748	0.00275883	0.162838	-1.735	DOWN
PSG4	-3.46452	5.57124	-3.17332	0.00277017	0.162838	-1.73866	DOWN
NOV	-2.77456	3.87809	-3.17055	0.00279168	0.162838	-1.74556	DOWN
PSTPIP2	-2.49303	3.49988	-3.16988	0.00279688	0.162838	-1.74722	DOWN
MMP1	-3.16789	7.78107	-3.16388	0.002844	0.163298	-1.76212	DOWN
NID1	2.07188	12.5048	3.16302	0.00285089	0.163298	-1.76428	UP
ONECUT2	2.19532	2.82944	3.16221	0.00285732	0.163298	-1.76629	UP
RTN4RL1	2.81176	3.63562	3.16203	0.00285873	0.163298	-1.76672	UP
DCLK2	-2.08574	4.29425	-3.15425	0.00292125	0.166086	-1.78601	DOWN
2019-03-01	2.3347	4.26751	3.13681	0.00306618	0.17236	-1.82916	UP
KLF2	-2.4603	4.5089	-3.1366	0.00306798	0.17236	-1.82968	DOWN
DAB1	-2.47257	3.44653	-3.13586	0.0030743	0.17236	-1.83152	DOWN
ELOVL2	-2.4371	4.66792	-3.133	0.00309874	0.17293	-1.83857	DOWN
PDE4B	2.09275	6.08017	3.1282	0.0031402	0.17444	-1.85041	UP
TOX	-1.99432	5.84695	-3.11784	0.00323146	0.178689	-1.87591	DOWN
SCHIP1	-2.39075	5.00351	-3.11556	0.00325191	0.179003	-1.88152	DOWN
MYPN	-3.04056	5.22625	-3.11368	0.00326883	0.17912	-1.88614	DOWN
CDH8	-2.49537	4.80915	-3.10402	0.00335717	0.182684	-1.90987	DOWN
MAPK13	-2.60229	7.16725	-3.10149	0.00338072	0.182684	-1.91609	DOWN
MAGI1	-2.25343	6.67673	-3.10141	0.00338147	0.182684	-1.91629	DOWN
PTK2B	2.20402	8.69702	3.09976	0.00339689	0.182684	-1.92034	UP
MAMSTR	-2.05059	3.5064	-3.09746	0.00341848	0.182684	-1.92597	DOWN
IQCJ-SCHIP1	-2.37791	5.0022	-3.09683	0.00342439	0.182684	-1.92751	DOWN
TGFBR3	1.98692	10.3861	3.08521	0.00353564	0.186975	-1.95594	UP
DOCK2	-3.03344	4.46024	-3.08521	0.00353569	0.186975	-1.95595	DOWN
KANK1	-1.97174	7.48986	-3.08144	0.00357249	0.187472	-1.96515	DOWN
JHY	-2.01333	2.45092	-3.0806	0.00358071	0.187472	-1.9672	DOWN
PTPRG	1.95271	9.64131	3.07951	0.00359154	0.187472	-1.96988	UP
HES1	2.05986	6.14554	3.07412	0.00364506	0.189151	-1.98303	UP
MXRA5	-2.45657	6.81959	-3.07261	0.00366022	0.189151	-1.98672	DOWN
C3orf52	-2.28301	3.43193	-3.07158	0.00367056	0.189151	-1.98922	DOWN
IGFLR1	2.12375	4.26979	3.06824	0.00370429	0.19008	-1.99735	UP
KCNE4	2.11446	9.17378	3.0633	0.00375482	0.19186	-2.00939	UP
CSRP2	-3.01462	4.66439	-3.05812	0.00380842	0.193781	-2.02197	DOWN
IKBKE	-1.94129	5.4003	-3.05477	0.0038436	0.194753	-2.03014	DOWN
COL13A1	-3.16834	4.61708	-3.04756	0.0039201	0.197802	-2.04764	DOWN
PLXNA2	2.13166	8.82168	3.04598	0.00393701	0.197831	-2.05146	UP
CCDC102B	2.76642	3.59783	3.03225	0.00408738	0.204538	-2.08472	UP
C1orf198	-1.92731	9.4582	-3.02878	0.00412621	0.204982	-2.0931	DOWN
DOK5	-2.03356	6.15941	-3.02843	0.0041301	0.204982	-2.09394	DOWN
GPD1L	2.55911	6.32875	3.01838	0.00424469	0.209809	-2.11821	UP
DLX2	2.73211	3.43772	3.01571	0.00427562	0.210058	-2.12464	UP
ZSCAN31	-2.06214	4.30272	-3.01495	0.00428441	0.210058	-2.12647	DOWN
PCED1B	-2.26411	2.91875	-3.01183	0.00432091	0.210993	-2.13399	DOWN
FAM167A	2.55062	7.6436	3.0099	0.00434358	0.211248	-2.13862	UP
AMIGO2	-2.26501	5.40603	-3.00602	0.00438964	0.212494	-2.14797	DOWN
ACSBG1	2.14431	2.28693	3.00479	0.00440429	0.212494	-2.15092	UP
LMO7	-2.05557	8.75484	-2.99756	0.00449152	0.215481	-2.1683	DOWN
SORT1	1.88351	8.36908	2.99671	0.00450179	0.215481	-2.17032	UP
RP1	1.94431	2.12026	2.99512	0.00452124	0.21556	-2.17414	UP
NDRG4	-2.4147	3.37966	-2.9883	0.0046055	0.218716	-2.19049	DOWN
SEMA3D	-2.24717	4.31501	-2.98425	0.00465634	0.220266	-2.20021	DOWN
MYBL1	-2.22008	5.76344	-2.97966	0.0047144	0.22088	-2.21118	DOWN
SAMHD1	2.07984	10.3445	2.97942	0.0047174	0.22088	-2.21175	UP
MRVI1	-2.28547	7.58187	-2.97698	0.00474867	0.22088	-2.21759	DOWN
RNF212B	1.88986	3.52833	2.97648	0.00475507	0.22088	-2.21879	UP
GMPR	-2.1959	3.86812	-2.97606	0.0047605	0.22088	-2.2198	DOWN
EVA1C	1.95719	5.21093	2.97242	0.0048075	0.222209	-2.22849	UP
SPINT2	-2.43371	1.82559	-2.96856	0.00485773	0.223677	-2.23769	DOWN
COL8A2	-2.59657	3.35187	-2.96369	0.00492196	0.225776	-2.2493	DOWN
PTPRE	-2.68963	4.59403	-2.95992	0.00497217	0.227219	-2.25828	DOWN
HIPK2	1.86747	10.8843	2.95607	0.00502394	0.228722	-2.26744	UP
SOX5	1.96508	4.36728	2.94851	0.00512721	0.232549	-2.28543	UP
GALNT5	-2.36176	7.19671	-2.94542	0.00516986	0.233608	-2.29275	DOWN
EFNA3	2.0999	2.74991	2.94092	0.00523273	0.23492	-2.30343	UP
REPS2	2.56877	5.25505	2.94057	0.00523769	0.23492	-2.30427	UP
AOX1	1.88765	10.7653	2.93648	0.00529543	0.236089	-2.31396	UP
TPD52L1	-2.71016	4.49008	-2.93597	0.00530274	0.236089	-2.31517	DOWN
SPTBN5	-2.48103	3.0647	-2.92919	0.00539987	0.239302	-2.33121	DOWN
PPFIA4	-2.07007	2.16562	-2.92815	0.00541496	0.239302	-2.33367	DOWN
MYOZ3	-2.09048	1.48765	-2.92616	0.00544395	0.239302	-2.33839	DOWN
HAPLN1	-3.30749	4.55793	-2.92547	0.00545396	0.239302	-2.34001	DOWN
NOCT	-1.81961	4.63811	-2.92303	0.00548978	0.240005	-2.34579	DOWN
FITM2	1.93907	5.78582	2.91993	0.00553538	0.241086	-2.35309	UP
LIMS2	-2.26527	5.38407	-2.91865	0.00555433	0.241086	-2.35611	DOWN
SPOCD1	-2.41033	5.80344	-2.91286	0.00564101	0.243974	-2.36977	DOWN
PRUNE2	1.9386	7.90657	2.91107	0.00566805	0.244271	-2.37399	UP
SRPX	1.89446	10.3475	2.9069	0.00573145	0.24585	-2.38381	UP
EPHA4	1.89838	8.73658	2.90428	0.00577169	0.24585	-2.38998	UP
TRPC4	-2.10301	6.11116	-2.90231	0.00580206	0.24585	-2.39461	DOWN
GUCY1A2	2.1246	3.06298	2.90129	0.00581778	0.24585	-2.397	UP
CPM	1.85699	9.81683	2.9002	0.00583477	0.24585	-2.39957	UP
PAPPA	1.9705	9.16497	2.89977	0.00584138	0.24585	-2.40057	UP
DCHS1	-2.43301	3.4349	-2.89942	0.00584681	0.24585	-2.40139	DOWN
SLC12A8	-2.07455	5.24685	-2.89388	0.00593368	0.24719	-2.41439	DOWN
EPG5	-1.85101	9.01328	-2.89317	0.00594497	0.24719	-2.41607	DOWN
GRIA1	2.2619	3.6774	2.89268	0.00595268	0.24719	-2.41721	UP
PKN3	-1.90126	3.27274	-2.8922	0.00596033	0.24719	-2.41834	DOWN
HSPB7	-2.50296	6.96742	-2.88979	0.00599862	0.247929	-2.42399	DOWN
CAVIN4	-2.31283	2.48909	-2.88534	0.00607	0.248622	-2.43441	DOWN
AGTR1	2.32252	7.78609	2.88459	0.00608224	0.248622	-2.43619	UP
TOR4A	-1.92589	5.42167	-2.88402	0.00609145	0.248622	-2.43752	DOWN
SLC19A2	1.96587	8.86615	2.88364	0.0060975	0.248622	-2.4384	UP
FILIP1L	-2.05513	7.40835	-2.87895	0.00617392	0.250893	-2.44937	DOWN
BAALC	-2.50362	4.23918	-2.87767	0.00619491	0.250904	-2.45236	DOWN
TLDC2	2.04948	6.88668	2.8729	0.00627379	0.252968	-2.46351	UP
B3GNT5	2.101	4.76202	2.87181	0.00629201	0.252968	-2.46606	UP
CFAP70	2.18802	3.22702	2.87082	0.00630853	0.252968	-2.46837	UP
ARHGAP31	-1.91519	7.50733	-2.86932	0.00633362	0.253136	-2.47187	DOWN
HIST1H2BD	1.91398	4.8247	2.86471	0.00641137	0.253973	-2.48261	UP
ADH1B	2.65109	9.39853	2.86292	0.00644188	0.253973	-2.48679	UP
TEK	-2.54941	5.77513	-2.86208	0.00645626	0.253973	-2.48875	DOWN
ABCC2	2.19299	5.31613	2.86197	0.00645805	0.253973	-2.489	UP
ID4	2.80621	4.13099	2.86189	0.00645943	0.253973	-2.48919	UP
SLC25A21	1.87586	2.06322	2.85702	0.00654326	0.256437	-2.50053	UP
SYNJ2	-2.25953	7.75601	-2.84423	0.00676801	0.264389	-2.53025	DOWN
TRNP1	1.91287	8.46837	2.84067	0.00683175	0.266021	-2.53849	UP
PTGS1	1.75808	10.093	2.83819	0.00687658	0.266908	-2.54424	UP
DEPP1	1.87939	8.68327	2.83466	0.0069408	0.26794	-2.55242	UP
TGFB3	-1.96629	5.66855	-2.83329	0.00696586	0.26794	-2.55558	DOWN
RELB	-1.9657	5.20615	-2.83309	0.00696955	0.26794	-2.55605	DOWN
RFX8	-1.93631	4.04086	-2.82649	0.00709157	0.270177	-2.5713	DOWN
WASF3	1.90242	10.2861	2.82524	0.00711498	0.270177	-2.5742	UP
TM4SF1	-2.64224	5.67155	-2.82409	0.0071364	0.270177	-2.57684	DOWN
PSG5	-3.2733	6.63081	-2.82295	0.00715779	0.270177	-2.57947	DOWN
PTPRU	2.4524	4.42111	2.82218	0.00717244	0.270177	-2.58127	UP
MEGF6	-2.53014	7.51138	-2.82115	0.00719175	0.270177	-2.58363	DOWN
INPP4B	-2.01168	4.53095	-2.82047	0.0072046	0.270177	-2.5852	DOWN
B3GNT8	-1.86285	2.55479	-2.82039	0.0072062	0.270177	-2.58539	DOWN
MMP17	1.90102	5.75633	2.81623	0.0072852	0.271781	-2.59497	UP
TRIM59	-1.9713	6.75179	-2.81578	0.00729387	0.271781	-2.59601	DOWN
ASTN2	1.93404	5.06514	2.811	0.00738586	0.274364	-2.60702	UP
RAB20	2.10457	5.61093	2.80785	0.00744717	0.275796	-2.61428	UP
S1PR3	1.75748	10.1036	2.80596	0.00748395	0.276313	-2.6186	UP
PTPRH	-1.79475	2.7523	-2.79956	0.00761046	0.28013	-2.63332	DOWN
VNN1	-2.00981	3.09861	-2.79711	0.00765931	0.281073	-2.63893	DOWN
TRIM14	-2.49635	5.12507	-2.79341	0.00773379	0.282861	-2.64742	DOWN
LRRC32	-1.98668	8.75747	-2.79237	0.00775474	0.282861	-2.64979	DOWN
PER3	-1.92095	6.279	-2.78954	0.00781233	0.284106	-2.65628	DOWN
EHD4	-2.03603	7.10853	-2.77974	0.0080146	0.290589	-2.6787	DOWN
SOCS1	2.58356	4.55664	2.7773	0.00806567	0.291568	-2.68427	UP
SHANK1	-1.9158	4.06107	-2.77327	0.00815067	0.29209	-2.69345	DOWN
CNN1	-2.38184	4.0733	-2.77196	0.00817858	0.29209	-2.69645	DOWN
RBM47	-1.86716	4.56963	-2.77084	0.0082025	0.29209	-2.69901	DOWN
OAS2	-1.86308	5.49348	-2.77052	0.00820925	0.29209	-2.69973	DOWN
2019-03-04	-2.50983	5.12968	-2.76919	0.00823771	0.29209	-2.70276	DOWN
PLIN4	3.83111	6.18124	2.7691	0.00823951	0.29209	-2.70295	UP
GPD1	3.9933	4.91271	2.76866	0.00824896	0.29209	-2.70396	UP
SMOX	1.94519	7.92362	2.76267	0.00837837	0.295808	-2.71759	UP
HECW2	-2.08182	6.45788	-2.75668	0.00850967	0.29957	-2.73121	DOWN
PDE3B	3.66032	3.05027	2.75483	0.00855072	0.300143	-2.73542	UP
EVA1A	-2.3775	6.32393	-2.74733	0.00871834	0.304807	-2.75241	DOWN
MGP	2.55107	7.2755	2.74664	0.00873393	0.304807	-2.75398	UP
LIFR	1.75997	9.12887	2.74421	0.00878906	0.305849	-2.75948	UP
CFD	3.06336	6.00625	2.74101	0.00886209	0.307476	-2.76672	UP
ADAMTS5	-1.96169	7.52052	-2.7389	0.0089106	0.307476	-2.7715	DOWN
NEDD4L	-1.7704	5.84321	-2.73884	0.00891197	0.307476	-2.77163	DOWN
FZD2	-1.83989	8.04569	-2.73518	0.00899671	0.308665	-2.77991	DOWN
BTN2A2	-1.80283	5.1143	-2.73515	0.00899741	0.308665	-2.77998	DOWN
ANGPTL1	2.05567	8.18459	2.73386	0.00902734	0.308817	-2.78288	UP
KLF5	-1.86026	5.08625	-2.72848	0.00915357	0.312253	-2.79502	DOWN
TMEM171	-1.87708	4.78793	-2.7235	0.00927194	0.315307	-2.80625	DOWN
PLIN1	4.10139	4.91783	2.7223	0.00930064	0.315307	-2.80895	UP
REV3L	1.71227	11.2909	2.72144	0.00932122	0.315307	-2.81088	UP
TSPAN2	-2.7727	3.6389	-2.71901	0.00937991	0.316219	-2.81637	DOWN
NEK7	-1.91179	9.70041	-2.71816	0.0094004	0.316219	-2.81827	DOWN
AMPH	2.49568	4.80945	2.71448	0.00948975	0.31834	-2.82654	UP
STK32B	1.85984	2.04987	2.71181	0.00955515	0.319649	-2.83254	UP
PDGFD	2.34069	5.93921	2.70946	0.00961302	0.319985	-2.83781	UP
FGD6	-1.75438	7.00257	-2.70926	0.00961805	0.319985	-2.83827	DOWN
NFIL3	1.75017	9.187	2.70333	0.00976559	0.322969	-2.85156	UP
LIPG	-2.51945	3.70965	-2.70218	0.0097946	0.322969	-2.85415	DOWN
MUC20	2.10136	2.75113	2.70053	0.00983615	0.322969	-2.85784	UP
PIK3IP1	-2.01967	5.84912	-2.70041	0.00983919	0.322969	-2.85811	DOWN
ADIPOQ	3.64956	6.35598	2.70033	0.00984107	0.322969	-2.85828	UP
TRIM6	-1.77181	5.539	-2.69913	0.00987135	0.323087	-2.86096	DOWN
CLMN	2.91604	3.59099	2.69763	0.00990948	0.32346	-2.86432	UP
NEFM	1.98005	3.81101	2.69424	0.00999591	0.325274	-2.8719	UP
P3H2	-2.29007	6.28831	-2.69335	0.0100188	0.325274	-2.87389	DOWN
TMEM51	-2.27798	3.99828	-2.69209	0.0100513	0.32539	-2.87672	DOWN
CSPG4	-1.89667	5.4815	-2.69112	0.0100761	0.32539	-2.87887	DOWN
FOS	2.08265	6.51475	2.6891	0.0101284	0.32621	-2.88339	UP
PLEKHG5	-2.03699	4.67681	-2.68272	0.0102951	0.330699	-2.89762	DOWN
EREG	2.03142	2.48533	2.67674	0.0104536	0.334902	-2.91094	UP
COL15A1	2.53516	8.39376	2.67412	0.0105236	0.336254	-2.91675	UP
TMEM26	-1.8764	2.60179	-2.67008	0.0106327	0.338849	-2.92575	DOWN
PIK3C2B	2.15491	5.04169	2.66649	0.0107306	0.341068	-2.93372	UP
CTSS	-2.14698	5.33095	-2.66431	0.0107902	0.342068	-2.93856	DOWN
MOK	-1.88486	6.22041	-2.65839	0.010954	0.346351	-2.95167	DOWN
NRROS	-1.92355	2.7627	-2.65335	0.0110953	0.349908	-2.96283	DOWN
XPNPEP2	2.03872	7.56204	2.65029	0.0111817	0.351717	-2.96958	UP
OTULINL	2.42422	2.02019	2.6468	0.0112813	0.353525	-2.97729	UP
FAM43A	1.8013	7.83197	2.64623	0.0112976	0.353525	-2.97855	UP
ZBED3	2.38174	3.27726	2.64075	0.0114556	0.357546	-2.99064	UP
KCNK15	2.29004	5.15429	2.63717	0.0115601	0.359879	-2.99853	UP
PKIB	-2.00065	3.00494	-2.63302	0.011682	0.362743	-3.00765	DOWN
GIPC2	-1.88096	5.07379	-2.63117	0.011737	0.363518	-3.01173	DOWN
BHLHE41	-1.76557	5.67074	-2.62911	0.0117983	0.364484	-3.01626	DOWN
ALDH1L1	3.56071	3.46726	2.62732	0.0118519	0.365142	-3.02019	UP
KCNQ3	-1.6509	3.96134	-2.62558	0.0119041	0.365142	-3.02401	DOWN
PRELID2	-1.81521	3.85974	-2.62538	0.0119101	0.365142	-3.02445	DOWN
CYS1	-1.91851	3.49923	-2.62329	0.0119731	0.366148	-3.02904	DOWN
SLC45A1	1.6942	4.20432	2.61685	0.0121693	0.371209	-3.04315	UP
EPS8L2	-1.92971	6.06319	-2.60992	0.0123837	0.376799	-3.05832	DOWN
ZNF610	1.80135	1.50112	2.60515	0.0125331	0.380392	-3.06873	UP
ITGB8	-1.96168	7.02115	-2.60231	0.012623	0.38216	-3.07492	DOWN
ZNF843	1.9705	3.04576	2.59898	0.0127289	0.3839	-3.08218	UP
DMD	-1.77917	4.99172	-2.59852	0.0127438	0.3839	-3.08319	DOWN
CCDC183	1.87056	3.14376	2.5972	0.0127862	0.384219	-3.08607	UP
TBXA2R	-1.76014	2.81434	-2.59276	0.0129293	0.387559	-3.09572	DOWN
PLAU	-2.00349	6.20054	-2.58529	0.0131737	0.393584	-3.11196	DOWN
DCLK1	3.51597	5.51494	2.58464	0.0131953	0.393584	-3.11338	UP
TMEFF2	2.04993	5.19691	2.58082	0.0133222	0.396392	-3.12167	UP
ADAMTS14	-2.52773	4.59533	-2.57895	0.0133847	0.397275	-3.12572	DOWN
LGR4	-1.78325	7.94213	-2.5773	0.01344	0.397942	-3.1293	DOWN
IFI27	-2.7023	5.87644	-2.56693	0.0137925	0.405771	-3.15172	DOWN
ITPKA	1.83246	3.31953	2.56669	0.0138009	0.405771	-3.15224	UP
LDLRAD3	1.60769	8.34115	2.56657	0.0138049	0.405771	-3.15249	UP
ERG	-1.99599	5.62651	-2.56525	0.0138505	0.406124	-3.15534	DOWN
UHRF1	-2.3905	4.78238	-2.5595	0.0140504	0.41099	-3.16774	DOWN
PAIP2B	1.89858	4.40408	2.5585	0.0140855	0.411026	-3.16991	UP
LY6G5C	1.76276	1.96896	2.55637	0.0141605	0.411668	-3.1745	UP
ATP6V1B1	1.70995	3.50992	2.55565	0.0141857	0.411668	-3.17604	UP
LYPD6	-1.81749	1.30735	-2.5525	0.0142974	0.411668	-3.18282	DOWN
SCN7A	3.42742	4.64867	2.55204	0.0143139	0.411668	-3.18382	UP
NUF2	-2.45418	4.45291	-2.55103	0.0143498	0.411668	-3.18599	DOWN
C4B	-2.00402	2.14466	-2.55026	0.0143774	0.411668	-3.18764	DOWN
GREB1L	2.11456	4.75077	2.54946	0.0144058	0.411668	-3.18935	UP
STARD10	-1.84595	4.53753	-2.54931	0.0144112	0.411668	-3.18968	DOWN
RHOBTB1	-1.60946	7.61918	-2.54925	0.0144135	0.411668	-3.18981	DOWN
PTPRF	-1.91235	7.97187	-2.54284	0.0146449	0.416388	-3.20358	DOWN
CMKLR1	1.65851	4.28577	2.54207	0.0146727	0.416388	-3.20522	UP
RASL11A	2.17974	4.26989	2.54182	0.0146819	0.416388	-3.20576	UP
ESR1	-1.91139	2.10333	-2.53936	0.0147716	0.417954	-3.21103	DOWN
LRRC2	-1.78244	3.87175	-2.53624	0.0148866	0.420224	-3.21772	DOWN
SEL1L3	-2.11683	7.44179	-2.53238	0.0150294	0.422547	-3.22597	DOWN
AJUBA	-1.74099	7.07282	-2.53213	0.0150386	0.422547	-3.2265	DOWN
AHRR	-1.62197	7.45439	-2.52705	0.015229	0.426696	-3.23736	DOWN
MICAL2	-2.18585	9.77465	-2.52631	0.0152568	0.426696	-3.23894	DOWN
GBP1	-1.59168	7.12306	-2.52342	0.0153665	0.42711	-3.24512	DOWN
SLC44A1	1.61863	11.391	2.52324	0.015373	0.42711	-3.24549	UP
MICB	-1.58502	5.48645	-2.52313	0.0153774	0.42711	-3.24573	DOWN
TBC1D2	-1.76875	7.02798	-2.52192	0.0154235	0.42741	-3.24832	DOWN
SPATA6	1.90761	4.90435	2.5205	0.0154776	0.427932	-3.25134	UP
MBP	-1.87711	6.70868	-2.51946	0.0155173	0.428052	-3.25355	DOWN
TRIM46	-1.633	2.62206	-2.51435	0.0157144	0.432502	-3.26443	DOWN
GLIPR1L2	1.87471	2.56226	2.51312	0.0157621	0.432534	-3.26705	UP
CD302	1.93311	9.12578	2.51248	0.015787	0.432534	-3.26841	UP
SLC6A15	1.77196	7.61032	2.51123	0.0158356	0.432555	-3.27106	UP
RGS7BP	-2.19061	3.91791	-2.51063	0.0158592	0.432555	-3.27235	DOWN
LY75-CD302	1.92476	9.11558	2.50729	0.0159902	0.434743	-3.27944	UP
IRAK2	-1.58279	3.92694	-2.50629	0.0160297	0.434743	-3.28157	DOWN
PKDCC	1.67695	9.64113	2.50585	0.0160471	0.434743	-3.2825	UP
ABLIM3	1.52444	9.76617	2.50337	0.0161454	0.43643	-3.28777	UP
SRSF12	2.05819	2.50764	2.50135	0.0162257	0.437624	-3.29204	UP
PROSER2	1.87976	3.56647	2.49715	0.0163939	0.440386	-3.30093	UP
RGS14	-1.67166	2.65068	-2.49698	0.0164008	0.440386	-3.30129	DOWN
CYLD	-1.59535	7.76596	-2.49126	0.016633	0.445633	-3.3134	DOWN
MT1E	1.59353	8.18956	2.48963	0.0166994	0.446423	-3.31683	UP
MKNK2	1.69157	9.59902	2.48536	0.0168755	0.449898	-3.32586	UP
MARCKSL1	1.62674	8.38088	2.48467	0.0169037	0.449898	-3.3273	UP
SESN3	1.84904	9.37674	2.4837	0.016944	0.449982	-3.32935	UP
SLFN13	-1.86318	3.66986	-2.47581	0.0172747	0.45627	-3.34598	DOWN
GXYLT2	-1.94775	3.94697	-2.47576	0.0172767	0.45627	-3.34608	DOWN
ETV1	-1.63253	6.3867	-2.47494	0.0173114	0.45627	-3.3478	DOWN
CSTA	2.08368	5.37911	2.47446	0.0173315	0.45627	-3.3488	UP
ITGA2	-1.64293	7.52482	-2.47291	0.0173975	0.457014	-3.35207	DOWN
NR4A2	1.66597	4.91051	2.47177	0.0174457	0.45729	-3.35445	UP
KCNG1	2.03711	7.15292	2.46858	0.0175824	0.459877	-3.36116	UP
SESN2	1.75848	8.29562	2.46631	0.01768	0.461397	-3.36592	UP
NR6A1	1.62559	2.14714	2.46449	0.0177589	0.461397	-3.36975	UP
GATA6	-1.63341	6.35547	-2.4643	0.0177671	0.461397	-3.37014	DOWN
RASSF5	-1.6922	4.36737	-2.46352	0.017801	0.461397	-3.37178	DOWN
NYNRIN	-1.58043	5.7923	-2.46271	0.0178358	0.461397	-3.37346	DOWN
RGMB	-1.53712	8.79612	-2.46195	0.0178691	0.461397	-3.37507	DOWN
CPED1	-1.99961	6.45222	-2.45905	0.0179959	0.463682	-3.38114	DOWN
E2F7	-2.20767	5.56606	-2.45274	0.0182745	0.46894	-3.39434	DOWN
MAPK8IP1	1.67112	5.06253	2.45267	0.0182774	0.46894	-3.39447	UP
ARMC9	-1.57449	7.26623	-2.45021	0.018387	0.470753	-3.3996	DOWN
SSH2	1.69884	9.52115	2.44407	0.0186636	0.476828	-3.41242	UP
TUFT1	-1.61018	5.91985	-2.44149	0.0187809	0.477919	-3.4178	DOWN
GSAP	-1.7364	4.00832	-2.44125	0.0187914	0.477919	-3.41828	DOWN
GLUL	1.55946	11.0386	2.44052	0.0188247	0.477919	-3.4198	UP
UNC5B	1.57691	10.3126	2.43286	0.0191779	0.482965	-3.43574	UP
WNT5A	1.57177	10.2537	2.43236	0.0192008	0.482965	-3.43677	UP
C9orf3	-1.74494	5.23618	-2.43194	0.0192204	0.482965	-3.43764	DOWN
MYO16	-1.76549	2.49117	-2.43083	0.0192723	0.482965	-3.43995	DOWN
MYCBPAP	1.81997	1.51664	2.43064	0.0192809	0.482965	-3.44033	UP
ADD2	-1.86914	5.66731	-2.43059	0.0192835	0.482965	-3.44045	DOWN
GDNF	-1.95065	3.84718	-2.42999	0.0193114	0.482965	-3.44169	DOWN
KIAA1549L	-1.76396	8.1998	-2.42932	0.0193425	0.482965	-3.44307	DOWN
PF4	1.88399	2.06999	2.42754	0.0194262	0.483392	-3.44677	UP
UCN	1.96253	1.63544	2.42726	0.0194395	0.483392	-3.44735	UP
CXCL8	-1.66313	6.01675	-2.42337	0.0196231	0.486959	-3.45541	DOWN
ABCA3	1.94147	1.61789	2.41501	0.020023	0.495538	-3.47269	UP
FMN2	-1.49654	7.78248	-2.41444	0.0200507	0.495538	-3.47387	DOWN
CIB2	-1.9671	2.81419	-2.41099	0.0202178	0.498652	-3.48098	DOWN
AKR1C1	1.50937	7.97029	2.40942	0.0202948	0.499532	-3.48423	UP
DIAPH3	-2.09158	6.06714	-2.40716	0.0204052	0.500057	-3.48888	DOWN
SHISAL1	-1.85207	5.49435	-2.40657	0.0204342	0.500057	-3.49009	DOWN
UACA	-1.53497	9.12612	-2.40645	0.02044	0.500057	-3.49033	DOWN
SLC7A14	-1.6751	6.14437	-2.40429	0.0205466	0.501651	-3.49479	DOWN
TMTC1	1.9223	2.60191	2.40299	0.020611	0.502211	-3.49746	UP
TRIM66	1.55403	6.76334	2.39459	0.021031	0.511417	-3.51472	UP
FAM184B	1.60922	3.00198	2.39332	0.0210954	0.511804	-3.51733	UP
BMP2	-1.96151	2.91836	-2.39192	0.0211663	0.511804	-3.5202	DOWN
RTL9	1.51427	3.05438	2.39177	0.0211737	0.511804	-3.5205	UP
UGCG	-1.62291	7.21992	-2.39011	0.0212586	0.512833	-3.52392	DOWN
SLC26A6	1.49456	6.5304	2.38802	0.0213651	0.514375	-3.52818	UP
PVRIG	-1.57981	2.8331	-2.38188	0.0216814	0.520444	-3.54074	DOWN
ADHFE1	1.9258	4.85076	2.3804	0.0217585	0.520444	-3.54377	UP
CHI3L1	-2.06247	4.45936	-2.37973	0.0217933	0.520444	-3.54514	DOWN
SDC1	-2.14537	6.67627	-2.37958	0.0218011	0.520444	-3.54544	DOWN
C16orf46	1.58676	3.98327	2.37819	0.021874	0.520444	-3.54829	UP
HIST1H4H	1.70878	3.08494	2.37817	0.021875	0.520444	-3.54833	UP
GTF2H2	1.58842	1.32368	2.37495	0.0220438	0.522965	-3.5549	UP
ASPM	-2.03629	7.24518	-2.3745	0.0220673	0.522965	-3.5558	DOWN
TERT	-1.88347	9.89693	-2.37167	0.0222172	0.525488	-3.56158	DOWN
HDAC9	-1.6077	5.62043	-2.36777	0.022425	0.529371	-3.56953	DOWN
NOXO1	1.67751	3.05889	2.36432	0.02261	0.53167	-3.57653	UP
FNDC8	1.681	3.35428	2.36367	0.0226451	0.53167	-3.57785	UP
INKA2	1.77669	6.54586	2.3635	0.0226541	0.53167	-3.5782	UP
BEND7	-1.66086	4.07501	-2.3597	0.0228603	0.535471	-3.58592	DOWN
C10orf55	-1.95434	3.54131	-2.35628	0.0230468	0.538796	-3.59285	DOWN
ZNF367	-1.77087	5.40687	-2.35388	0.0231787	0.540836	-3.59771	DOWN
FAM110B	1.61165	8.11177	2.35193	0.0232863	0.541048	-3.60166	UP
CTH	1.70535	5.7358	2.35142	0.0233148	0.541048	-3.6027	UP
COLEC12	-2.20972	7.87284	-2.35129	0.0233218	0.541048	-3.60295	DOWN
SLC37A2	-1.75254	2.53673	-2.34638	0.0235951	0.546341	-3.61288	DOWN
PCDHB5	1.61517	3.13845	2.34433	0.0237101	0.547956	-3.61702	UP
ADAMTS12	-1.72599	8.00723	-2.34264	0.0238052	0.549107	-3.62043	DOWN
PITPNC1	1.83757	7.40373	2.3417	0.0238584	0.549287	-3.62233	UP
PODXL	-1.75776	6.93388	-2.34059	0.0239214	0.549693	-3.62457	DOWN
SMIM3	1.51797	9.19671	2.33902	0.0240107	0.5507	-3.62774	UP
SLC20A2	-1.56395	7.75557	-2.33799	0.0240693	0.551	-3.62982	DOWN
APOE	2.66216	6.12214	2.33498	0.0242414	0.552864	-3.63588	UP
ZBTB18	-1.51577	6.13066	-2.33497	0.024242	0.552864	-3.6359	DOWN
CD274	-1.78252	2.78994	-2.33236	0.024392	0.555201	-3.64115	DOWN
TRAK1	-1.48016	7.01211	-2.32917	0.0245765	0.555201	-3.64756	DOWN
ALDH2	1.61433	8.53635	2.328	0.0246447	0.555201	-3.64991	UP
CSGALNACT1	1.5357	7.42245	2.3276	0.0246675	0.555201	-3.6507	UP
FRMD6	-1.46612	10.3121	-2.32758	0.0246689	0.555201	-3.65075	DOWN
DOCK3	-1.50426	1.1999	-2.32739	0.0246797	0.555201	-3.65112	DOWN
SCD5	1.754	7.18598	2.32694	0.0247063	0.555201	-3.65204	UP
CES4A	-1.78712	3.21117	-2.32685	0.0247113	0.555201	-3.65221	DOWN
SLC17A9	-1.89237	5.2313	-2.32295	0.0249401	0.559305	-3.66004	DOWN
RPS6KA1	-1.91378	2.64508	-2.32159	0.0250202	0.560064	-3.66277	DOWN
OPN1SW	-1.60623	3.28663	-2.31975	0.0251291	0.561464	-3.66646	DOWN
P2RY11	1.60098	6.29952	2.31681	0.0253034	0.563305	-3.67233	UP
FZD8	1.68519	7.42789	2.31679	0.0253045	0.563305	-3.67237	UP
CTNNAL1	-1.67676	7.59634	-2.31562	0.0253746	0.563829	-3.67472	DOWN
SPC24	-2.01488	3.03929	-2.31439	0.0254481	0.563888	-3.67717	DOWN
MYORG	1.60093	4.15603	2.31338	0.0255086	0.563888	-3.67919	UP
ALPK2	-1.5957	8.70865	-2.31226	0.025576	0.563888	-3.68143	DOWN
PRKAR2B	2.37799	4.48166	2.3117	0.0256099	0.563888	-3.68256	UP
ZNF589	1.73063	6.13835	2.31169	0.0256101	0.563888	-3.68256	UP
MYOM2	1.48842	2.24035	2.31016	0.0257027	0.563962	-3.68563	UP
PCDH9	1.58247	6.69867	2.31009	0.0257066	0.563962	-3.68576	UP
SLC6A9	1.47432	8.53917	2.30843	0.0258072	0.564297	-3.68907	UP
GPR39	-1.77359	3.87913	-2.3083	0.0258151	0.564297	-3.68933	DOWN
RASSF3	-1.42853	6.15532	-2.30555	0.0259827	0.566938	-3.69483	DOWN
DSP	-1.64988	9.29802	-2.2985	0.0264157	0.573078	-3.70885	DOWN
PATJ	-1.47155	5.19035	-2.29755	0.0264748	0.573078	-3.71074	DOWN
DCXR	1.55943	7.43569	2.29738	0.0264855	0.573078	-3.71109	UP
PRICKLE2	1.48317	8.91255	2.29699	0.0265098	0.573078	-3.71186	UP
GAS1	1.5865	9.28948	2.29665	0.0265306	0.573078	-3.71253	UP
FAM111B	-2.10992	4.94921	-2.29629	0.026553	0.573078	-3.71324	DOWN
STAC3	1.70176	1.91813	2.29561	0.0265954	0.573078	-3.71459	UP
SCG2	1.43433	4.35624	2.29391	0.0267016	0.573371	-3.71798	UP
TLN2	1.42903	9.85969	2.29271	0.0267771	0.573371	-3.72037	UP
IFIT3	-1.50707	7.27705	-2.29266	0.0267802	0.573371	-3.72047	DOWN
IFNGR1	1.46901	9.42254	2.29237	0.0267983	0.573371	-3.72104	UP
TNFRSF21	1.57639	6.81436	2.28591	0.0272059	0.580028	-3.73383	UP
FRMD3	1.74171	5.03136	2.28465	0.0272864	0.580028	-3.73633	UP
LY75	1.64402	1.87002	2.28424	0.0273124	0.580028	-3.73714	UP
TTYH2	1.71089	2.92574	2.28378	0.0273417	0.580028	-3.73805	UP
FMO2	2.58789	5.15657	2.28367	0.027349	0.580028	-3.73828	UP
PRKG2	-1.667	5.50499	-2.28217	0.0274451	0.581037	-3.74125	DOWN
SEMA7A	-1.86848	7.40307	-2.2799	0.0275905	0.581037	-3.74572	DOWN
PPFIBP2	-1.76171	3.47475	-2.27971	0.0276032	0.581037	-3.74611	DOWN
PRTG	1.61872	3.14142	2.27908	0.0276433	0.581037	-3.74734	UP
FIGN	-1.51983	4.56636	-2.27859	0.0276754	0.581037	-3.74832	DOWN
SESN1	1.55263	7.89576	2.27845	0.0276844	0.581037	-3.7486	UP
MT1A	1.6031	2.6284	2.27574	0.0278598	0.582826	-3.75394	UP
SERAC1	-1.5926	7.01116	-2.27565	0.0278659	0.582826	-3.75413	DOWN
TENM4	-1.92158	5.6209	-2.27361	0.0279984	0.583885	-3.75815	DOWN
CUTC	1.62197	7.66221	2.27339	0.028013	0.583885	-3.75859	UP
EPHX1	1.56356	9.06506	2.27162	0.0281282	0.584279	-3.76206	UP
TSSK6	1.63473	3.71249	2.27162	0.0281284	0.584279	-3.76206	UP
BUB1B	-1.9591	5.99162	-2.27014	0.0282253	0.585289	-3.76498	DOWN
TMEM173	-1.53006	7.57385	-2.26894	0.0283047	0.585932	-3.76735	DOWN
RGN	-1.86647	3.06857	-2.26128	0.0288134	0.595444	-3.78241	DOWN
JPH2	-1.61564	4.19802	-2.2599	0.0289055	0.595898	-3.78511	DOWN
FBN2	1.50515	11.3369	2.25948	0.0289338	0.595898	-3.78594	UP
RGS3	-1.50805	6.21995	-2.2527	0.0293924	0.604308	-3.79923	DOWN
DDR1	-1.4857	6.68848	-2.2508	0.0295221	0.604308	-3.80295	DOWN
THSD4	-1.92125	7.28604	-2.24984	0.0295881	0.604308	-3.80483	DOWN
CHRNB1	1.65942	3.57901	2.24915	0.0296352	0.604308	-3.80617	UP
NHSL2	-1.60275	4.37066	-2.24901	0.0296451	0.604308	-3.80646	DOWN
HS3ST3B1	1.65806	5.1742	2.24897	0.029648	0.604308	-3.80654	UP
BDKRB1	-1.73259	4.3552	-2.24777	0.0297302	0.604308	-3.80888	DOWN
C10orf143	1.47076	4.12931	2.24685	0.0297937	0.604308	-3.81068	UP
FRK	-1.59579	2.31288	-2.24648	0.029819	0.604308	-3.8114	DOWN
HS6ST1	1.47016	7.8178	2.24479	0.0299357	0.604308	-3.81469	UP
2019-03-10	1.72971	2.7339	2.24461	0.0299481	0.604308	-3.81504	UP
DGAT2	1.58014	6.94548	2.24383	0.0300021	0.604308	-3.81656	UP
SYCE2	1.53219	2.06931	2.24329	0.0300399	0.604308	-3.81762	UP
CBS	1.54125	8.70025	2.24316	0.0300491	0.604308	-3.81788	UP
FBLIM1	-1.48685	7.77983	-2.24243	0.0300996	0.604308	-3.8193	DOWN
AGFG2	1.42583	7.4736	2.24184	0.0301406	0.604308	-3.82045	UP
ZNF221	1.42294	3.84675	2.23698	0.0304812	0.610127	-3.82993	UP
MKI67	-2.05721	8.42247	-2.23369	0.0307134	0.612921	-3.83633	DOWN
KLHL29	1.62836	7.20805	2.23357	0.030722	0.612921	-3.83656	UP
HSPA4L	1.57159	2.80966	2.23211	0.0308256	0.613876	-3.8394	UP
MEST	-1.59657	6.01896	-2.23147	0.0308712	0.613876	-3.84065	DOWN
AHNAK2	-1.4765	9.53892	-2.22603	0.0312602	0.620593	-3.8512	DOWN
FAP	-1.76764	8.72792	-2.225	0.0313342	0.620884	-3.8532	DOWN
EPSTI1	-1.90469	4.86074	-2.2244	0.0313775	0.620884	-3.85436	DOWN
ARNTL2	-1.72714	6.78655	-2.2222	0.0315368	0.623019	-3.85862	DOWN
FYN	1.36725	9.88903	2.21822	0.031827	0.62634	-3.86634	UP
STARD9	1.48846	6.17557	2.21796	0.031846	0.62634	-3.86684	UP
IL17RD	-1.58221	2.5177	-2.21777	0.0318601	0.62634	-3.86721	DOWN
SGIP1	-1.79759	5.08674	-2.21264	0.0322372	0.63219	-3.87712	DOWN
SCUBE3	-1.66357	8.6317	-2.21191	0.032291	0.63219	-3.87852	DOWN
DACT3	-1.52459	5.65976	-2.2116	0.0323145	0.63219	-3.87913	DOWN
LRRC17	-1.95455	4.48472	-2.21089	0.0323665	0.63219	-3.88049	DOWN
NRIP2	1.62144	2.8512	2.20966	0.0324584	0.632965	-3.88287	UP
LYPD1	-1.72046	4.12834	-2.20801	0.0325815	0.634343	-3.88606	DOWN
NUAK1	-1.54286	7.36312	-2.20677	0.0326742	0.635127	-3.88845	DOWN
PAMR1	-1.65251	7.77132	-2.20477	0.032824	0.636597	-3.89229	DOWN
PTPN22	-1.5564	3.69164	-2.20404	0.0328789	0.636597	-3.8937	DOWN
WWP2	-1.42112	7.58535	-2.20366	0.0329075	0.636597	-3.89443	DOWN
DNAH5	-1.48977	3.15084	-2.19851	0.0332971	0.643106	-3.90432	DOWN
WNT2B	-1.60162	3.44644	-2.19737	0.0333844	0.643766	-3.90652	DOWN
HIST3H2A	1.71922	3.33636	2.19511	0.0335571	0.646067	-3.91086	UP
CDK15	-1.7314	6.00939	-2.19313	0.0337092	0.647211	-3.91466	DOWN
PLCB4	-1.63939	3.93935	-2.19294	0.0337234	0.647211	-3.91501	DOWN
RAB11FIP1	-1.35835	2.51074	-2.19011	0.033942	0.650376	-3.92044	DOWN
MYEF2	-1.37766	3.55239	-2.18896	0.0340307	0.651046	-3.92263	DOWN
VDR	-1.3764	7.81578	-2.18281	0.0345114	0.6592	-3.9344	DOWN
LAMA2	1.56162	11.4802	2.18159	0.0346072	0.659989	-3.93673	UP
EPHB1	1.5114	4.5134	2.17747	0.0349327	0.66515	-3.94458	UP
GAS2L3	-1.46772	5.00456	-2.17535	0.0351016	0.667279	-3.94862	DOWN
INHBA	-2.23686	7.15558	-2.17468	0.0351548	0.667279	-3.94989	DOWN
DLGAP5	-2.12141	5.82938	-2.1688	0.0356275	0.672611	-3.96109	DOWN
MYBL2	-2.50279	5.45463	-2.16844	0.0356561	0.672611	-3.96176	DOWN
PLK4	-1.8666	5.04318	-2.16739	0.0357413	0.672611	-3.96376	DOWN
TMEM64	1.47647	9.79306	2.16687	0.0357835	0.672611	-3.96475	UP
ADAM19	-1.59547	8.17195	-2.16662	0.0358035	0.672611	-3.96522	DOWN
GPR85	-1.45079	4.78286	-2.16556	0.0358902	0.672611	-3.96724	DOWN
ALS2CR12	1.64798	1.37332	2.16527	0.0359134	0.672611	-3.96778	UP
NDUFA4L2	1.71503	4.30664	2.1649	0.0359434	0.672611	-3.96848	UP
DOCK10	-1.58904	7.88267	-2.16413	0.0360067	0.672611	-3.96996	DOWN
KIF23	-1.84115	6.67922	-2.16373	0.0360391	0.672611	-3.97071	DOWN
GPR146	1.79038	3.28447	2.16364	0.0360466	0.672611	-3.97089	UP
IQGAP3	-2.01569	5.88207	-2.16039	0.0363124	0.676528	-3.97704	DOWN
CLGN	1.42646	7.87921	2.15954	0.0363822	0.676786	-3.97864	UP
CELF2	1.62015	8.86782	2.15759	0.0365429	0.677777	-3.98233	UP
TAF4B	1.36141	5.91563	2.15742	0.0365573	0.677777	-3.98267	UP
DIPK1B	1.34001	4.96689	2.15686	0.0366033	0.677777	-3.98372	UP
OAS3	-1.55943	7.93884	-2.15375	0.0368615	0.681018	-3.9896	DOWN
ZNF460	1.38111	4.67312	2.15304	0.0369207	0.681018	-3.99094	UP
FGFBP3	1.5667	3.50174	2.15225	0.036987	0.681018	-3.99244	UP
PDGFC	-1.43291	7.04983	-2.15205	0.0370033	0.681018	-3.99281	DOWN
NCEH1	-1.40521	6.82683	-2.15093	0.0370969	0.681704	-3.99492	DOWN
TRIM35	1.42658	8.29293	2.14959	0.0372093	0.682734	-3.99745	UP
PAQR5	-1.55581	5.19097	-2.14885	0.0372719	0.682849	-3.99886	DOWN
MSX1	1.61642	7.23667	2.14806	0.0373384	0.683033	-4.00035	UP
RGS2	1.79206	7.92257	2.14417	0.0376671	0.688007	-4.00768	UP
IL17RC	1.50593	7.67327	2.14135	0.0379067	0.691341	-4.01298	UP
KCTD16	-1.52338	5.13016	-2.14052	0.0379777	0.691595	-4.01454	DOWN
NTF3	-1.45892	3.78775	-2.13712	0.0382699	0.695868	-4.02094	DOWN
KIF4A	-1.89127	5.45396	-2.12939	0.0389395	0.706982	-4.03542	DOWN
ME3	-1.69773	5.69587	-2.12755	0.0391009	0.708851	-4.03888	DOWN
MYC	1.35035	9.67024	2.12042	0.0397309	0.718169	-4.05221	UP
SORBS2	1.44111	7.28839	2.12025	0.0397457	0.718169	-4.05252	UP
ASPN	-1.90256	7.27053	-2.11963	0.0398005	0.718169	-4.05367	DOWN
SLC26A4	-1.6449	2.53293	-2.11905	0.0398521	0.718169	-4.05475	DOWN
MSC	-1.37645	7.55	-2.11743	0.0399974	0.719715	-4.05778	DOWN
FNDC5	-1.69651	2.31596	-2.11603	0.0401225	0.720274	-4.06038	DOWN
CA11	-1.6918	1.90485	-2.11575	0.0401474	0.720274	-4.0609	DOWN
PHACTR2	-1.35383	8.22807	-2.11317	0.0403799	0.721067	-4.06571	DOWN
CHST7	1.62028	6.11592	2.11199	0.0404861	0.721067	-4.0679	UP
HSPA2	1.40637	5.9531	2.1112	0.0405581	0.721067	-4.06938	UP
TFEB	-1.56123	3.79512	-2.11067	0.0406062	0.721067	-4.07037	DOWN
FAM169A	1.43563	2.85732	2.10978	0.040687	0.721067	-4.07202	UP
IFIT1	-1.49139	7.51544	-2.10963	0.0406998	0.721067	-4.07229	DOWN
SLC9A7	-1.41338	8.12813	-2.10944	0.0407177	0.721067	-4.07265	DOWN
C1orf21	1.41464	9.58729	2.10939	0.0407217	0.721067	-4.07273	UP
DPP4	-1.53188	9.30984	-2.10933	0.0407275	0.721067	-4.07285	DOWN
RIN3	-1.50278	6.81241	-2.10478	0.041143	0.726907	-4.0813	DOWN
ADAMTS10	-1.43067	6.59068	-2.10397	0.0412168	0.726907	-4.08279	DOWN
TMCC2	-1.45297	4.22437	-2.10368	0.0412435	0.726907	-4.08333	DOWN
LIAS	1.41612	5.8478	2.10289	0.0413161	0.726907	-4.0848	UP
PLXNC1	-1.50344	3.32454	-2.10245	0.0413575	0.726907	-4.08563	DOWN
APOBEC3B	-2.02124	3.2978	-2.10083	0.0415065	0.72847	-4.08862	DOWN
SNAI2	1.31459	10.5496	2.0984	0.0417318	0.73122	-4.09313	UP
ANKLE1	1.50768	1.7564	2.09784	0.041784	0.73122	-4.09417	UP
MMD	1.3516	7.2127	2.092	0.0423295	0.739698	-4.10495	UP
DUSP10	1.34456	6.61339	2.09117	0.0424081	0.740002	-4.10649	UP
CYSRT1	1.44739	1.99864	2.08989	0.0425287	0.740788	-4.10885	UP
PTER	1.36143	7.13011	2.08939	0.0425754	0.740788	-4.10977	UP
PEX11G	1.47715	3.13464	2.08688	0.0428134	0.743859	-4.1144	UP
TTPAL	1.31058	9.60964	2.08032	0.0434405	0.753674	-4.12647	UP
PNMA2	1.36315	9.2918	2.07909	0.0435586	0.754238	-4.12873	UP
SSTR1	-1.88832	6.72257	-2.07841	0.0436237	0.754238	-4.12997	DOWN
MT2A	1.34977	8.8428	2.07773	0.0436897	0.754238	-4.13122	UP
LZTS3	1.47168	5.452	2.0774	0.0437221	0.754238	-4.13184	UP
TSTD3	1.36042	4.15588	2.07619	0.0438385	0.755169	-4.13404	UP
CLDN23	1.61881	3.14149	2.07426	0.0440268	0.757336	-4.1376	UP
KIF20A	-1.80074	6.50267	-2.07119	0.0443258	0.760881	-4.14321	DOWN
SMAGP	-1.41877	5.16574	-2.07086	0.0443585	0.760881	-4.14382	DOWN
KCNMA1	-1.53226	7.3962	-2.06844	0.0445958	0.763648	-4.14825	DOWN
NFKBIE	-1.36723	4.77728	-2.06738	0.0447005	0.763648	-4.15019	DOWN
STAT4	-1.63763	2.74247	-2.06729	0.044709	0.763648	-4.15035	DOWN
DSG2	-1.77337	6.35211	-2.06489	0.0449459	0.765473	-4.15473	DOWN
AEBP1	-1.5654	10.0387	-2.0638	0.0450549	0.765473	-4.15674	DOWN
GREM1	-1.40344	11.6208	-2.06253	0.0451809	0.765473	-4.15905	DOWN
INKA1	-1.52743	2.5345	-2.06251	0.045183	0.765473	-4.15909	DOWN
SELENOP	1.54916	6.74441	2.06245	0.0451882	0.765473	-4.15919	UP
TBC1D16	1.36156	11.0653	2.06187	0.0452466	0.765473	-4.16026	UP
FRY	-1.31896	5.18532	-2.06159	0.0452742	0.765473	-4.16076	DOWN
BST1	-1.57356	6.43491	-2.06112	0.0453216	0.765473	-4.16163	DOWN
ACSM3	1.40675	4.30569	2.05797	0.0456361	0.769711	-4.16735	UP
NUDT11	1.33012	6.56638	2.05663	0.0457709	0.770912	-4.1698	UP
COL5A3	1.48274	9.52054	2.05469	0.0459667	0.772397	-4.17333	UP
COL18A1	1.38589	10.1866	2.05449	0.0459866	0.772397	-4.17369	UP
C7	2.54009	3.90922	2.05369	0.0460679	0.772691	-4.17515	UP
C1QTNF3	-1.61439	3.12593	-2.05272	0.0461661	0.773266	-4.17691	DOWN
ADAMTS13	1.50219	4.20527	2.05126	0.0463141	0.774052	-4.17956	UP
HIVEP1	-1.26814	7.93456	-2.051	0.0463409	0.774052	-4.18004	DOWN
CSAD	1.4118	6.69664	2.04823	0.046623	0.777692	-4.18506	UP
SEZ6L2	1.4796	3.02548	2.04699	0.0467505	0.777797	-4.18732	UP
LAYN	-1.47608	7.15966	-2.04692	0.0467577	0.777797	-4.18745	DOWN
TMEM225B	1.45912	3.73813	2.04343	0.0471162	0.781822	-4.19376	UP
AMPD3	-1.24248	6.28081	-2.04321	0.0471397	0.781822	-4.19417	DOWN
SURF2	1.3594	5.53972	2.04186	0.0472791	0.781822	-4.19662	UP
FMOD	1.3718	2.93565	2.04176	0.0472896	0.781822	-4.1968	UP
KCNQ5	-1.48944	5.76416	-2.04089	0.0473794	0.781822	-4.19837	DOWN
BUB1	-1.70886	5.71865	-2.04024	0.0474471	0.781822	-4.19955	DOWN
BRIP1	-1.64338	5.67475	-2.04014	0.0474573	0.781822	-4.19973	DOWN
KIFC3	-1.53671	7.28681	-2.03957	0.0475162	0.781822	-4.20075	DOWN
HIST1H2AC	1.3732	5.84371	2.03747	0.0477359	0.784337	-4.20456	UP
CYGB	1.6282	6.49953	2.03687	0.0477985	0.784337	-4.20565	UP
RHOU	1.5057	7.11187	2.03506	0.0479874	0.78637	-4.2089	UP
DIRAS1	-1.34534	4.29888	-2.03396	0.0481031	0.7872	-4.21089	DOWN
PKNOX2	-1.52587	3.77482	-2.03034	0.0484851	0.792382	-4.21742	DOWN
TPRG1	1.64215	3.3219	2.02943	0.0485809	0.792877	-4.21905	UP
GCNT4	-1.31807	4.16827	-2.02768	0.0487676	0.793289	-4.22222	DOWN
PPM1H	-1.46195	3.67566	-2.02723	0.048815	0.793289	-4.22302	DOWN
ADRA2A	1.5526	5.17127	2.02704	0.0488357	0.793289	-4.22337	UP
PDE1A	1.31146	6.23095	2.02673	0.0488682	0.793289	-4.22392	UP
DENND3	-1.38271	5.40996	-2.02594	0.0489527	0.793597	-4.22534	DOWN
GALNT16	-1.74048	4.64729	-2.02148	0.0494303	0.800269	-4.23335	DOWN

## Sheet: lncRNA
	logFC	AveExpr	t	P.Value	adj.P.Val	B	change
SH3RF3-AS1	3.99783	4.33153	5.46801	8.45199e-06	0.00138613	3.65381	UP
LINC01554	2.06476	2.51312	2.69679	0.0118653	0.389182	-3.04398	UP
SNHG9	2.04431	2.99607	2.61045	0.0145252	0.397022	-3.22407	UP
LINC01914	2.35106	3.7517	2.53333	0.0173599	0.405288	-3.38202	UP
C18orf65	1.61033	2.13442	2.38974	0.0240418	0.414517	-3.66838	UP
LINC02202	1.65481	5.27296	2.1494	0.0406451	0.414517	-4.12314	UP
UBAC2-AS1	1.68876	3.06826	2.13757	0.0416808	0.414517	-4.14468	UP
LOH12CR2	1.85555	2.70725	2.09563	0.0455446	0.414517	-4.22035	UP
OSER1-DT	1.92061	5.55395	2.05168	0.0499313	0.414517	-4.29849	UP
LINC01119	-3.77343	4.69466	-4.33288	0.000179809	0.0147443	0.801647	DOWN
SERPINB9P1	-2.3494	3.05612	-3.09247	0.00454825	0.207554	-2.17975	DOWN
MIAT	-3.24292	5.39566	-3.04924	0.0050623	0.207554	-2.27699	DOWN
LINC00601	-1.85328	3.72904	-2.47644	0.0197702	0.405288	-3.4967	DOWN
LINC00211	-1.48301	1.26416	-2.24503	0.0330851	0.414517	-3.94606	DOWN
PTCSC3	-1.71658	3.81294	-2.18001	0.0380718	0.414517	-4.06704	DOWN
CYTOR	-1.48621	4.62884	-2.08805	0.0462759	0.414517	-4.23391	DOWN
LINC00865	-1.53364	2.38293	-2.06571	0.0484922	0.414517	-4.27368	DOWN

## Sheet: miRNA
	adj.P.Val	P.Value	t	B	logFC	change
hsa-miR-663	0.000864	2.53e-06	13.5682	5.309	6.2189	UP
hsa-miR-455-5p	0.244826	0.00645	3.81466	-2.319	5.6824	UP
hsa-miR-3607-3p	0.000891	3.91e-06	12.7278	4.948	5.5496	UP
hsa-miR-1290	0.244826	0.0342	2.61722	-4.035	3.3136	UP
hsa-miR-18a	0.244826	0.033	2.64171	-3.999	3.0846	UP
kshv-miR-K12-5*	0.244826	0.0446	2.4362	-4.302	2.9307	UP
hsa-miR-455-3p	0.056866	0.000291	6.59726	0.887	2.9265	UP
hsa-miR-769-5p	0.244826	0.0321	2.66156	-3.969	2.9069	UP
hsa-miR-652	0.244826	0.032	2.66254	-3.968	2.8983	UP
hsa-miR-124	0.244826	0.031	2.68481	-3.935	2.7025	UP
hsa-miR-887	0.244826	0.0307	2.69131	-3.926	2.645	UP
hsa-miR-339-3p	0.244826	0.0299	2.70896	-3.9	2.4844	UP
hsa-miR-609	0.244826	0.0297	2.7144	-3.892	2.4323	UP
hsa-miR-30a*	0.244826	0.0387	2.53314	-4.159	1.8361	UP
hsa-miR-30c	0.244826	0.00752	3.69914	-2.478	1.4476	UP
hsa-miR-181b	0.244826	0.0126	3.31829	-3.013	1.4461	UP
hsa-miR-92a	0.244826	0.0133	3.27709	-3.072	1.3301	UP
hsa-miR-132	0.244826	0.0387	2.53298	-4.159	1.2312	UP
hsa-miR-1973	0.244826	0.0345	2.61219	-4.042	1.1548	UP
hsa-miR-3653	0.244826	0.0317	2.67014	-3.957	1.0056	UP
hsa-miR-337-5p	0.244826	0.0213	-2.94408	-3.554	-1.0442	DOWN
hsa-miR-140-3p	0.244826	0.0284	-2.74581	-3.845	-1.0663	DOWN
hsa-miR-376c	0.244826	0.0264	-2.79674	-3.77	-1.0897	DOWN
hsa-miR-381	0.244826	0.0131	-3.28916	-3.054	-1.1134	DOWN
hsa-miR-125a-3p	0.244826	0.0316	-2.67087	-3.956	-1.1951	DOWN
hsa-miR-377	0.244826	0.0145	-3.21596	-3.16	-1.2309	DOWN
hsa-miR-3132	0.244826	0.0218	-2.92817	-3.578	-1.2426	DOWN
hsa-miR-140-5p	0.244826	0.0351	-2.59899	-4.062	-1.2584	DOWN
hsa-miR-3659	0.244826	0.0223	-2.91219	-3.601	-1.2768	DOWN
hsa-miR-130b	0.244826	0.012	-3.35449	-2.961	-1.3343	DOWN
hsa-miR-193a-3p	0.244826	0.0279	-2.75651	-3.83	-1.3528	DOWN
hsv2-miR-H6	0.244826	0.0231	-2.88741	-3.637	-1.4895	DOWN
hsa-miR-29b-1*	0.244826	0.0261	-2.80263	-3.762	-1.7893	DOWN
hsa-miR-29b	0.244826	0.00588	-3.88527	-2.223	-1.8052	DOWN
hsa-miR-503	0.244826	0.0159	-3.14912	-3.256	-1.854	DOWN
hsa-miR-136	0.170519	0.00112	-5.26908	-0.499	-2.1151	DOWN
hsa-miR-135a*	0.244826	0.0237	-2.86941	-3.664	-2.5579	DOWN
hsa-miR-718	0.244826	0.0441	-2.44406	-4.29	-2.6408	DOWN
hsa-miR-199b-5p	0.244826	0.00417	-4.15521	-1.864	-2.8129	DOWN
hsa-miR-362-3p	0.244826	0.0218	-2.92767	-3.578	-3.6262	DOWN
hsa-miR-642b	0.244826	0.0304	-2.69813	-3.916	-3.7692	DOWN
hsa-miR-218	0.244826	0.0122	-3.33835	-2.984	-3.9373	DOWN
hsa-miR-376a*	0.244826	0.0499	-2.3612	-4.412	-4.0168	DOWN
hsa-miR-299-3p	0.244826	0.0483	-2.38274	-4.38	-4.0988	DOWN
hsa-miR-376b	0.244826	0.00946	-3.52741	-2.717	-4.3597	DOWN
hsa-miR-154*	0.244826	0.0125	-3.32638	-3.001	-4.4195	DOWN
hsa-miR-146b-5p	0.075752	0.000443	-6.16076	0.459	-5.3184	DOWN
hsa-miR-150*	0.000461	3.37e-07	-18.1696	6.808	-6.2771	DOWN
hsa-miR-4271	0.000814	1.43e-06	-14.7402	5.761	-6.286	DOWN
hsa-miR-134	0.000891	3.26e-06	-13.0722	5.1	-6.3853	DOWN
hsa-miR-371-5p	0.000814	1.79e-06	-14.2722	5.587	-6.5082	DOWN
