# Supplementary material for: Crucial lncRNAs associated with adipocyte differentiation from human adipose-derived stem cells based on co-expression and ceRNA network analyses
Source: PeerJ. 2019 Sep 6;7:e7544. doi: 10.7717/peerj.7544 (PMC6733242; doi:10.7717/peerj.7544)
Supplement: Supplemental Information 3 [file peerj-07-7544-s003.csv]

mRNA	lncRNA	Cor	PValue	mRNAchange	lncRNAchange
GALNT5	CYTOR	0.925479612	1.60E-05	DOWN	DOWN
LGR4	CYTOR	0.900937548	6.35E-05	DOWN	DOWN
TBXA2R	CYTOR	0.919502764	2.32E-05	DOWN	DOWN
SLC20A2	CYTOR	0.908171491	4.40E-05	DOWN	DOWN
DOCK10	CYTOR	0.928926315	1.27E-05	DOWN	DOWN
EPHA2	CYTOR	0.906977637	4.68E-05	DOWN	DOWN
AMIGO2	CYTOR	0.924785293	1.67E-05	DOWN	DOWN
RFX8	CYTOR	0.937364073	6.83E-06	DOWN	DOWN
ARSI	CYTOR	0.953439559	1.59E-06	DOWN	DOWN
ADAMTS10	CYTOR	0.925033185	1.64E-05	DOWN	DOWN
FNDC5	CYTOR	0.907619545	4.53E-05	DOWN	DOWN
ELOVL2	CYTOR	0.941306208	4.97E-06	DOWN	DOWN
OAS3	CYTOR	0.937840308	6.58E-06	DOWN	DOWN
PTPRF	CYTOR	0.914500959	3.11E-05	DOWN	DOWN
ALPK2	CYTOR	0.926404947	1.50E-05	DOWN	DOWN
GPR68	CYTOR	0.922685053	1.91E-05	DOWN	DOWN
EVA1A	CYTOR	0.931244895	1.08E-05	DOWN	DOWN
STARD10	CYTOR	0.908174633	4.40E-05	DOWN	DOWN
LIPG	CYTOR	0.901122681	6.29E-05	DOWN	DOWN
EPS8L2	CYTOR	0.923277502	1.84E-05	DOWN	DOWN
SPTBN5	CYTOR	0.905467879	5.06E-05	DOWN	DOWN
C3orf52	CYTOR	0.907189908	4.63E-05	DOWN	DOWN
KIFC3	CYTOR	0.949119226	2.47E-06	DOWN	DOWN
ARHGAP31	CYTOR	0.903442781	5.61E-05	DOWN	DOWN
TMEM51	CYTOR	0.956600604	1.13E-06	DOWN	DOWN
ARNTL2	CYTOR	0.944635484	3.73E-06	DOWN	DOWN
TGFB3	CYTOR	0.971357608	1.45E-07	DOWN	DOWN
HOXD1	CYTOR	0.918332521	2.49E-05	DOWN	DOWN
PPP1R13L	CYTOR	0.937588464	6.71E-06	DOWN	DOWN
CTSS	CYTOR	0.928580087	1.30E-05	DOWN	DOWN
PKN3	CYTOR	0.943072704	4.28E-06	DOWN	DOWN
FILIP1L	CYTOR	0.934439996	8.54E-06	DOWN	DOWN
PRKG2	CYTOR	0.903670301	5.55E-05	DOWN	DOWN
COL8A2	CYTOR	0.937376808	6.82E-06	DOWN	DOWN
TBC1D2	CYTOR	0.989361952	1.05E-09	DOWN	DOWN
PLK2	CYTOR	0.907823102	4.48E-05	DOWN	DOWN
DPP4	CYTOR	0.931254854	1.08E-05	DOWN	DOWN
IQCJ-SCHIP1	CYTOR	0.947416838	2.90E-06	DOWN	DOWN
FBLIM1	CYTOR	0.92415695	1.74E-05	DOWN	DOWN
ADAMTS12	CYTOR	0.940707128	5.22E-06	DOWN	DOWN
TENM4	CYTOR	0.951758736	1.90E-06	DOWN	DOWN
GDNF	CYTOR	0.945513687	3.45E-06	DOWN	DOWN
LYPD1	CYTOR	0.911427694	3.69E-05	DOWN	DOWN
LOXL4	CYTOR	0.929206768	1.24E-05	DOWN	DOWN
SLC4A4	CYTOR	0.939225418	5.89E-06	DOWN	DOWN
PLAU	CYTOR	0.927702203	1.38E-05	DOWN	DOWN
EHD4	CYTOR	0.946808132	3.07E-06	DOWN	DOWN
PAMR1	CYTOR	0.94531525	3.51E-06	DOWN	DOWN
ME3	CYTOR	0.949935218	2.28E-06	DOWN	DOWN
MYOZ3	CYTOR	0.922890354	1.88E-05	DOWN	DOWN
SLC12A8	CYTOR	0.942717016	4.41E-06	DOWN	DOWN
MEGF6	CYTOR	0.930520177	1.13E-05	DOWN	DOWN
TUFT1	CYTOR	0.917226738	2.66E-05	DOWN	DOWN
C9orf3	CYTOR	0.953835618	1.53E-06	DOWN	DOWN
BTN2A2	CYTOR	0.903343693	5.64E-05	DOWN	DOWN
DCHS1	CYTOR	0.935586831	7.83E-06	DOWN	DOWN
CTNNAL1	CYTOR	0.939341923	5.84E-06	DOWN	DOWN
SLC17A9	CYTOR	0.915474671	2.94E-05	DOWN	DOWN
BST1	CYTOR	0.913641516	3.27E-05	DOWN	DOWN
FAP	CYTOR	0.953431217	1.59E-06	DOWN	DOWN
TMEM171	CYTOR	0.931228622	1.08E-05	DOWN	DOWN
LRRC17	CYTOR	0.933818087	8.94E-06	DOWN	DOWN
AEBP1	CYTOR	0.914783339	3.06E-05	DOWN	DOWN
SCHIP1	CYTOR	0.947275194	2.94E-06	DOWN	DOWN
MXRA5	CYTOR	0.946285425	3.22E-06	DOWN	DOWN
CNN1	CYTOR	0.904449074	5.33E-05	DOWN	DOWN
RBM47	LINC00601	0.913427613	3.31E-05	DOWN	DOWN
ARHGAP31	LINC00601	0.913743302	3.25E-05	DOWN	DOWN
INPP4B	LINC00601	0.937517645	6.75E-06	DOWN	DOWN
ZNF365	LINC01119	0.936518086	7.29E-06	DOWN	DOWN
LPXN	LINC01119	0.907942336	4.45E-05	DOWN	DOWN
PRAG1	LINC01119	0.932529052	9.83E-06	DOWN	DOWN
P3H2	LINC01119	0.915150807	3.00E-05	DOWN	DOWN
MYPN	LINC01119	0.905287942	5.11E-05	DOWN	DOWN
FMN1	LINC01119	0.94197256	4.70E-06	DOWN	DOWN
GREM2	LINC01119	0.927398213	1.41E-05	DOWN	DOWN
SHROOM3	LINC01119	0.931645016	1.05E-05	DOWN	DOWN
SLC4A4	LINC01119	0.901321916	6.23E-05	DOWN	DOWN
GALNT5	LINC01119	0.913494064	3.29E-05	DOWN	DOWN
PRSS12	LINC01119	0.921175484	2.10E-05	DOWN	DOWN
EPHA2	LINC01119	0.922898505	1.88E-05	DOWN	DOWN
NCEH1	LINC01119	0.917309054	2.65E-05	DOWN	DOWN
MAGI1	LINC01119	0.935654313	7.79E-06	DOWN	DOWN
PTPRB	LINC01119	0.937770948	6.62E-06	DOWN	DOWN
DCLK2	LINC01119	0.917556193	2.61E-05	DOWN	DOWN
LMO7	LINC01119	0.92614645	1.53E-05	DOWN	DOWN
NUAK2	LINC01119	0.964406598	4.24E-07	DOWN	DOWN
GIPC2	LINC01119	0.928775964	1.28E-05	DOWN	DOWN
NTM	LINC01119	0.900089386	6.62E-05	DOWN	DOWN
GPR68	LINC01119	0.904003714	5.45E-05	DOWN	DOWN
PHACTR2	LINC01119	0.919330408	2.35E-05	DOWN	DOWN
RCAN2	LINC01119	0.914915237	3.04E-05	DOWN	DOWN
SERPINB7	LINC01119	0.923937078	1.76E-05	DOWN	DOWN
RAB3B	LINC01119	0.901566419	6.16E-05	DOWN	DOWN
RAB27B	LINC01119	0.935885379	7.66E-06	DOWN	DOWN
TNIP3	LINC01119	0.919090612	2.38E-05	DOWN	DOWN
TRPC4	LINC01119	0.949509052	2.37E-06	DOWN	DOWN
FRY	LINC01119	0.931366497	1.07E-05	DOWN	DOWN
MOK	LINC01119	0.932872566	9.58E-06	DOWN	DOWN
C6orf132	LINC01119	0.920821326	2.14E-05	DOWN	DOWN
SEMA3A	LINC01119	0.900583125	6.46E-05	DOWN	DOWN
SERPINB2	LINC01119	0.938760714	6.12E-06	DOWN	DOWN
CARD10	LINC01119	0.92462388	1.69E-05	DOWN	DOWN
ARNT2	LINC01119	0.917902819	2.56E-05	DOWN	DOWN
MGARP	LINC01119	0.915733347	2.90E-05	DOWN	DOWN
FRMPD4	LINC01119	0.910148264	3.96E-05	DOWN	DOWN
ARHGAP31	LINC01119	0.918982063	2.40E-05	DOWN	DOWN
SYNJ2	LINC01119	0.90558294	5.03E-05	DOWN	DOWN
KCND2	LINC01119	0.905885232	4.96E-05	DOWN	DOWN
CSRP2	LINC01119	0.901486505	6.18E-05	DOWN	DOWN
CEMIP	LINC01119	0.938834411	6.08E-06	DOWN	DOWN
CDCP1	LINC01119	0.965035298	3.88E-07	DOWN	DOWN
TSPAN2	LINC01119	0.901725028	6.11E-05	DOWN	DOWN
MMP1	LINC01119	0.914789414	3.06E-05	DOWN	DOWN
NDRG4	LINC01119	0.901235345	6.26E-05	DOWN	DOWN
IL6	LINC01119	0.957429012	1.03E-06	DOWN	DOWN
ARHGEF28	LINC01119	0.970385501	1.71E-07	DOWN	DOWN
OXTR	LINC01119	0.929368783	1.23E-05	DOWN	DOWN
ATP8B1	LINC01119	0.943851831	4.00E-06	DOWN	DOWN
ABAT	LINC01914	0.902684052	5.83E-05	UP	UP
SPON1	LINC01914	0.915796233	2.89E-05	UP	UP
SCD5	LINC01914	0.912380578	3.51E-05	UP	UP
ABCC2	LINC01914	0.95081066	2.09E-06	UP	UP
CUTC	LINC01914	0.931867895	1.03E-05	UP	UP
PRUNE2	LINC01914	0.908792639	4.26E-05	UP	UP
RIPOR2	LINC01914	0.904723539	5.26E-05	UP	UP
PNMA2	LINC01914	0.920629809	2.17E-05	UP	UP
CYP19A1	LINC01914	0.924964488	1.65E-05	UP	UP
ROR2	LINC01914	0.932824893	9.62E-06	UP	UP
SPATA6	LINC01914	0.948368075	2.65E-06	UP	UP
RTL9	LINC01914	0.910223071	3.94E-05	UP	UP
SAMHD1	LINC01914	0.930460335	1.14E-05	UP	UP
ANGPTL1	LINC01914	0.93223563	1.00E-05	UP	UP
SESN2	LINC01914	0.923149705	1.85E-05	UP	UP
XPNPEP2	LINC01914	0.938577891	6.21E-06	UP	UP
AKR1C2	LINC01914	0.909813682	4.03E-05	UP	UP
ALDH2	LINC01914	0.900960079	6.34E-05	UP	UP
IL17RE	LINC01914	0.906622161	4.77E-05	UP	UP
TLDC2	LINC01914	0.929151224	1.25E-05	UP	UP
CSTA	LINC01914	0.904055411	5.44E-05	UP	UP
METTL7A	LINC01914	0.924194155	1.73E-05	UP	UP
GALNT15	LINC01914	0.907809541	4.48E-05	UP	UP
GUCY1A2	LINC01914	0.901148087	6.28E-05	UP	UP
EDNRB	LINC01914	0.913088112	3.37E-05	UP	UP
AMPH	LINC01914	0.956438071	1.15E-06	UP	UP
RASL11A	LINC01914	0.908398243	4.35E-05	UP	UP
CLDN23	LINC01914	0.94658374	3.13E-06	UP	UP
SESN3	LINC01914	0.903113845	5.70E-05	UP	UP
RASSF4	LINC01914	0.915405022	2.96E-05	UP	UP
CCDC69	LINC01914	0.925791591	1.56E-05	UP	UP
TMEM59L	LINC01914	0.919421149	2.33E-05	UP	UP
SLC44A1	LINC01914	0.923936395	1.76E-05	UP	UP
PTER	LINC02202	0.909581036	4.08E-05	UP	UP
GALNT15	LINC02202	0.900544286	6.47E-05	UP	UP
FAM43A	LINC02202	0.92439775	1.71E-05	UP	UP
SSH2	LINC02202	0.958516328	9.02E-07	UP	UP
PDE1A	LINC02202	0.991457682	3.53E-10	UP	UP
ADHFE1	LINC02202	0.931271951	1.08E-05	UP	UP
RASSF4	LINC02202	0.926015591	1.54E-05	UP	UP
CUTC	LINC02202	0.918946142	2.40E-05	UP	UP
FAM110B	LINC02202	0.929755883	1.20E-05	UP	UP
NID1	LINC02202	0.936229889	7.46E-06	UP	UP
PIK3R1	LINC02202	0.913652915	3.27E-05	UP	UP
ZNF589	LINC02202	0.957199987	1.05E-06	UP	UP
ALDH2	LINC02202	0.946631065	3.12E-06	UP	UP
NDUFA4L2	LINC02202	0.932251632	1.00E-05	UP	UP
TSTD3	LINC02202	0.935746345	7.74E-06	UP	UP
RASL11A	LINC02202	0.919871383	2.27E-05	UP	UP
SOX5	LINC02202	0.902288265	5.94E-05	UP	UP
WASF3	LINC02202	0.936478963	7.32E-06	UP	UP
SPATA6	LINC02202	0.938009589	6.49E-06	UP	UP
ACSM3	LINC02202	0.91765755	2.59E-05	UP	UP
ABAT	LINC02202	0.965524007	3.62E-07	UP	UP
TLDC2	LINC02202	0.948680213	2.57E-06	UP	UP
MKNK2	LINC02202	0.92872615	1.28E-05	UP	UP
CBS	LINC02202	0.909809212	4.03E-05	UP	UP
ABCC2	LINC02202	0.927578366	1.39E-05	UP	UP
HIST1H2AC	LINC02202	0.924462939	1.70E-05	UP	UP
SRPX	LINC02202	0.900683407	6.43E-05	UP	UP
LAMA2	LINC02202	0.949408097	2.40E-06	UP	UP
CELF2	LINC02202	0.935411459	7.94E-06	UP	UP
PTK2B	LINC02202	0.904941996	5.20E-05	UP	UP
ITPR1	LINC02202	0.950422666	2.17E-06	UP	UP
LY75-CD302	LINC02202	0.937706776	6.65E-06	UP	UP
DUSP10	LINC02202	0.943240268	4.22E-06	UP	UP
IL16	LINC02202	0.936894006	7.09E-06	UP	UP
SAMHD1	LINC02202	0.950027333	2.26E-06	UP	UP
GREB1L	LINC02202	0.943545129	4.11E-06	UP	UP
AOX1	LINC02202	0.923009554	1.87E-05	UP	UP
GLIPR1L2	LINC02202	0.907750501	4.50E-05	UP	UP
IL17RE	LINC02202	0.920903113	2.13E-05	UP	UP
SLC6A15	LINC02202	0.942832974	4.37E-06	UP	UP
HIST1H2BD	LINC02202	0.932565984	9.80E-06	UP	UP
GPD1L	LINC02202	0.942491082	4.50E-06	UP	UP
EPHB6	LINC02202	0.932701895	9.70E-06	UP	UP
RNF212B	LINC02202	0.927212878	1.42E-05	UP	UP
TGFBR3	LINC02202	0.935718233	7.76E-06	UP	UP
TMEM59L	LINC02202	0.933572035	9.11E-06	UP	UP
SLC44A1	LINC02202	0.92996344	1.18E-05	UP	UP
ANGPTL1	LINC02202	0.939122172	5.94E-06	UP	UP
METTL7A	LINC02202	0.905704974	5.00E-05	UP	UP
PAIP2B	LINC02202	0.944194508	3.88E-06	UP	UP
SCD5	LINC02202	0.973250681	1.03E-07	UP	UP
SESN3	LINC02202	0.929122052	1.25E-05	UP	UP
REPS2	LINC02202	0.937426895	6.80E-06	UP	UP
CD302	LINC02202	0.938061879	6.47E-06	UP	UP
PNMA2	LINC02202	0.921410891	2.07E-05	UP	UP
TBC1D16	LINC02202	0.913169937	3.35E-05	UP	UP
CSAD	LINC02202	0.949775539	2.31E-06	UP	UP
HTRA3	LINC02202	0.905447334	5.07E-05	UP	UP
TBXAS1	LINC02202	0.910300463	3.93E-05	UP	UP
LZTS3	LINC02202	0.919256288	2.36E-05	UP	UP
XPNPEP2	LINC02202	0.967710447	2.62E-07	UP	UP
MGP	LOH12CR2	0.905624095	5.02E-05	UP	UP
CHRNB1	LOH12CR2	0.9273671	1.41E-05	UP	UP
WASF3	LOH12CR2	0.934139283	8.73E-06	UP	UP
CBS	LOH12CR2	0.971160004	1.50E-07	UP	UP
SOX5	LOH12CR2	0.913272724	3.34E-05	UP	UP
ALDH2	LOH12CR2	0.917065183	2.68E-05	UP	UP
PROSER2	LOH12CR2	0.904883747	5.22E-05	UP	UP
TBC1D16	LOH12CR2	0.952566499	1.75E-06	UP	UP
P2RY11	LOH12CR2	0.936126266	7.52E-06	UP	UP
ZNF843	LOH12CR2	0.970560673	1.66E-07	UP	UP
SLC44A1	LOH12CR2	0.917552695	2.61E-05	UP	UP
UNC5B	LOH12CR2	0.913886125	3.22E-05	UP	UP
GLIPR1L2	LOH12CR2	0.924262979	1.73E-05	UP	UP
CUTC	LOH12CR2	0.900790081	6.39E-05	UP	UP
SCD5	LOH12CR2	0.934512068	8.49E-06	UP	UP
MKNK2	LOH12CR2	0.916092739	2.84E-05	UP	UP
FITM2	LOH12CR2	0.930284134	1.15E-05	UP	UP
CSTA	LOH12CR2	0.958119248	9.46E-07	UP	UP
ADAMTS13	LOH12CR2	0.929047941	1.26E-05	UP	UP
CYSRT1	LOH12CR2	0.969007302	2.14E-07	UP	UP
PKDCC	LOH12CR2	0.912254894	3.53E-05	UP	UP
SSH2	LOH12CR2	0.900488796	6.49E-05	UP	UP
SRPX	LOH12CR2	0.902256254	5.95E-05	UP	UP
CFAP70	LOH12CR2	0.91523221	2.99E-05	UP	UP
EPHB6	LOH12CR2	0.919284735	2.35E-05	UP	UP
LZTS3	LOH12CR2	0.949756152	2.32E-06	UP	UP
LAMA2	LOH12CR2	0.924909554	1.66E-05	UP	UP
FAM110B	LOH12CR2	0.934552439	8.47E-06	UP	UP
REPS2	LOH12CR2	0.940532247	5.30E-06	UP	UP
NDUFA4L2	LOH12CR2	0.900694299	6.42E-05	UP	UP
DCXR	LOH12CR2	0.927172144	1.43E-05	UP	UP
XPNPEP2	LOH12CR2	0.947892643	2.77E-06	UP	UP
FNDC8	LOH12CR2	0.940912657	5.13E-06	UP	UP
IL16	LOH12CR2	0.915258424	2.98E-05	UP	UP
ZNF589	LOH12CR2	0.938019415	6.49E-06	UP	UP
SPATA6	LOH12CR2	0.902908784	5.76E-05	UP	UP
TSTD3	LOH12CR2	0.912893533	3.41E-05	UP	UP
TBC1D2	MIAT	0.913572813	3.28E-05	DOWN	DOWN
SPTBN5	MIAT	0.907072665	4.66E-05	DOWN	DOWN
KCND2	MIAT	0.919777006	2.28E-05	DOWN	DOWN
STARD10	MIAT	0.949770878	2.31E-06	DOWN	DOWN
GALNT5	MIAT	0.90147144	6.19E-05	DOWN	DOWN
LIMS2	MIAT	0.913900728	3.22E-05	DOWN	DOWN
DENND3	MIAT	0.917244316	2.66E-05	DOWN	DOWN
ERG	MIAT	0.93905834	5.97E-06	DOWN	DOWN
CACNB4	MIAT	0.944941239	3.63E-06	DOWN	DOWN
PAMR1	MIAT	0.932059087	1.02E-05	DOWN	DOWN
GPR68	MIAT	0.911905399	3.60E-05	DOWN	DOWN
COL8A2	MIAT	0.926383463	1.50E-05	DOWN	DOWN
EPS8L2	MIAT	0.924349394	1.72E-05	DOWN	DOWN
FBLIM1	MIAT	0.900351272	6.53E-05	DOWN	DOWN
GMPR	MIAT	0.915277575	2.98E-05	DOWN	DOWN
KCNMA1	MIAT	0.923971527	1.76E-05	DOWN	DOWN
MAGI1	MIAT	0.929897693	1.18E-05	DOWN	DOWN
FILIP1L	MIAT	0.956188038	1.18E-06	DOWN	DOWN
SEMA7A	MIAT	0.93019697	1.16E-05	DOWN	DOWN
AMIGO2	MIAT	0.917965669	2.55E-05	DOWN	DOWN
WNT2B	MIAT	0.920657514	2.17E-05	DOWN	DOWN
EHD4	MIAT	0.907438488	4.57E-05	DOWN	DOWN
GDNF	MIAT	0.906801222	4.73E-05	DOWN	DOWN
LPXN	MIAT	0.933197047	9.36E-06	DOWN	DOWN
CTSS	MIAT	0.906712017	4.75E-05	DOWN	DOWN
TMEM51	MIAT	0.934747124	8.34E-06	DOWN	DOWN
DSP	MIAT	0.920754997	2.15E-05	DOWN	DOWN
TGFB3	MIAT	0.929324834	1.23E-05	DOWN	DOWN
CAVIN4	MIAT	0.940993469	5.10E-06	DOWN	DOWN
OXTR	MIAT	0.919594224	2.31E-05	DOWN	DOWN
NEK7	MIAT	0.903873848	5.49E-05	DOWN	DOWN
MXRA5	MIAT	0.912206427	3.54E-05	DOWN	DOWN
RFX8	MIAT	0.932255248	1.00E-05	DOWN	DOWN
NHSL2	MIAT	0.934425339	8.55E-06	DOWN	DOWN
DPP4	MIAT	0.908599642	4.30E-05	DOWN	DOWN
CAP2	MIAT	0.948852131	2.53E-06	DOWN	DOWN
MAP3K7CL	MIAT	0.945593796	3.43E-06	DOWN	DOWN
OAS2	MIAT	0.912289233	3.52E-05	DOWN	DOWN
ITGA2	MIAT	0.915369948	2.96E-05	DOWN	DOWN
TMEM173	MIAT	0.914416504	3.13E-05	DOWN	DOWN
HOXD1	MIAT	0.966135232	3.31E-07	DOWN	DOWN
SEMA3D	MIAT	0.909284515	4.15E-05	DOWN	DOWN
CSPG4	MIAT	0.914929042	3.04E-05	DOWN	DOWN
SLC12A8	MIAT	0.905268183	5.12E-05	DOWN	DOWN
RCAN2	MIAT	0.938464985	6.26E-06	DOWN	DOWN
LOXL4	MIAT	0.961885996	5.94E-07	DOWN	DOWN
PTPRF	MIAT	0.923767136	1.78E-05	DOWN	DOWN
LRRC32	MIAT	0.902941654	5.75E-05	DOWN	DOWN
EPHA2	MIAT	0.917868212	2.56E-05	DOWN	DOWN
KIAA1755	MIAT	0.905057224	5.17E-05	DOWN	DOWN
TERT	MIAT	0.942111501	4.64E-06	DOWN	DOWN
PTGIR	MIAT	0.928143027	1.34E-05	DOWN	DOWN
ALPK2	MIAT	0.914055165	3.19E-05	DOWN	DOWN
NYNRIN	MIAT	0.904201655	5.40E-05	DOWN	DOWN
PODXL	MIAT	0.940170697	5.46E-06	DOWN	DOWN
SLC9A7	MIAT	0.948993623	2.50E-06	DOWN	DOWN
SLC6A15	OSER1-DT	0.949978335	2.27E-06	UP	UP
PIK3C2B	OSER1-DT	0.90873941	4.27E-05	UP	UP
REPS2	OSER1-DT	0.967956386	2.52E-07	UP	UP
ITPR1	OSER1-DT	0.938326111	6.33E-06	UP	UP
EPHB6	OSER1-DT	0.955962526	1.21E-06	UP	UP
CUTC	OSER1-DT	0.958381337	9.17E-07	UP	UP
TSTD3	OSER1-DT	0.920803421	2.15E-05	UP	UP
RASL11A	OSER1-DT	0.904499398	5.32E-05	UP	UP
TLDC2	OSER1-DT	0.967641439	2.65E-07	UP	UP
METTL7A	OSER1-DT	0.949952832	2.27E-06	UP	UP
SSH2	OSER1-DT	0.940139251	5.47E-06	UP	UP
ADH1B	OSER1-DT	0.94538113	3.49E-06	UP	UP
SCD5	OSER1-DT	0.960405924	7.17E-07	UP	UP
CBS	OSER1-DT	0.925841498	1.56E-05	UP	UP
NID1	OSER1-DT	0.91375931	3.25E-05	UP	UP
ABAT	OSER1-DT	0.91888095	2.41E-05	UP	UP
GLIPR1L2	OSER1-DT	0.919188023	2.37E-05	UP	UP
APOD	OSER1-DT	0.929079128	1.25E-05	UP	UP
XPNPEP2	OSER1-DT	0.971434088	1.43E-07	UP	UP
ZBED3	OSER1-DT	0.904149026	5.41E-05	UP	UP
ALDH2	OSER1-DT	0.939351097	5.83E-06	UP	UP
ZNF589	OSER1-DT	0.952595684	1.74E-06	UP	UP
LAMA2	OSER1-DT	0.960746615	6.87E-07	UP	UP
PDE1A	OSER1-DT	0.916753234	2.73E-05	UP	UP
WASF3	OSER1-DT	0.919473447	2.33E-05	UP	UP
CSTA	OSER1-DT	0.91750649	2.62E-05	UP	UP
CLDN23	OSER1-DT	0.951626331	1.92E-06	UP	UP
SLC44A1	OSER1-DT	0.919467492	2.33E-05	UP	UP
CCDC102B	OSER1-DT	0.931254624	1.08E-05	UP	UP
SESN3	OSER1-DT	0.95835505	9.20E-07	UP	UP
FMO2	OSER1-DT	0.915267393	2.98E-05	UP	UP
HIST1H2AC	OSER1-DT	0.939741969	5.65E-06	UP	UP
ABCC2	OSER1-DT	0.919997409	2.25E-05	UP	UP
SCN7A	OSER1-DT	0.931322956	1.07E-05	UP	UP
IL17RE	OSER1-DT	0.938962541	6.02E-06	UP	UP
PNMA2	OSER1-DT	0.959725687	7.80E-07	UP	UP
SAMHD1	OSER1-DT	0.962391259	5.56E-07	UP	UP
CELF2	OSER1-DT	0.913032161	3.38E-05	UP	UP
LY75-CD302	OSER1-DT	0.922046197	1.99E-05	UP	UP
TMEM59L	OSER1-DT	0.936949564	7.06E-06	UP	UP
CCDC69	OSER1-DT	0.94693875	3.03E-06	UP	UP
ANGPTL1	OSER1-DT	0.969643689	1.93E-07	UP	UP
SPON1	OSER1-DT	0.943694225	4.05E-06	UP	UP
TBC1D16	OSER1-DT	0.902785293	5.80E-05	UP	UP
SELENOP	OSER1-DT	0.915955435	2.86E-05	UP	UP
TMEFF2	OSER1-DT	0.920500148	2.19E-05	UP	UP
RHOU	OSER1-DT	0.904774277	5.25E-05	UP	UP
MRO	OSER1-DT	0.920458883	2.19E-05	UP	UP
IL16	OSER1-DT	0.949381717	2.40E-06	UP	UP
DCLK1	OSER1-DT	0.948238124	2.68E-06	UP	UP
GPX3	OSER1-DT	0.901654082	6.13E-05	UP	UP
PTK2B	OSER1-DT	0.922938487	1.88E-05	UP	UP
CD302	OSER1-DT	0.924937283	1.65E-05	UP	UP
MKNK2	OSER1-DT	0.923418015	1.82E-05	UP	UP
LZTS3	OSER1-DT	0.908598538	4.30E-05	UP	UP
EDNRB	OSER1-DT	0.912984412	3.39E-05	UP	UP
ROR2	OSER1-DT	0.954085781	1.49E-06	UP	UP
GPD1L	OSER1-DT	0.951183545	2.01E-06	UP	UP
SPATA6	OSER1-DT	0.975564272	6.59E-08	UP	UP
PAIP2B	OSER1-DT	0.909694531	4.06E-05	UP	UP
MGP	OSER1-DT	0.918478659	2.47E-05	UP	UP
FAM110B	OSER1-DT	0.962909986	5.19E-07	UP	UP
DAB1	PTCSC3	0.971818557	1.34E-07	DOWN	DOWN
LAYN	PTCSC3	0.902847926	5.78E-05	DOWN	DOWN
MGARP	PTCSC3	0.913835371	3.23E-05	DOWN	DOWN
RBM24	PTCSC3	0.908792908	4.26E-05	DOWN	DOWN
TMEM173	PTCSC3	0.908651076	4.29E-05	DOWN	DOWN
MOK	PTCSC3	0.9057273	5.00E-05	DOWN	DOWN
FBLIM1	PTCSC3	0.90966741	4.06E-05	DOWN	DOWN
DSP	PTCSC3	0.946950573	3.03E-06	DOWN	DOWN
NYNRIN	PTCSC3	0.931643065	1.05E-05	DOWN	DOWN
TM4SF1	PTCSC3	0.907585754	4.54E-05	DOWN	DOWN
NEDD4L	PTCSC3	0.908058873	4.43E-05	DOWN	DOWN
NEK7	PTCSC3	0.903472665	5.60E-05	DOWN	DOWN
DIRAS1	PTCSC3	0.958504544	9.04E-07	DOWN	DOWN
LPXN	PTCSC3	0.905680358	5.01E-05	DOWN	DOWN
GREM2	PTCSC3	0.934174431	8.71E-06	DOWN	DOWN
AHRR	PTCSC3	0.915710347	2.90E-05	DOWN	DOWN
STARD10	SERPINB9P1	0.900948653	6.35E-05	DOWN	DOWN
PAMR1	SERPINB9P1	0.904430769	5.34E-05	DOWN	DOWN
MYOZ3	SERPINB9P1	0.916546112	2.77E-05	DOWN	DOWN
TGFB3	SERPINB9P1	0.937365776	6.83E-06	DOWN	DOWN
CAVIN4	SERPINB9P1	0.905771978	4.99E-05	DOWN	DOWN
PKN3	SERPINB9P1	0.928169409	1.33E-05	DOWN	DOWN
LOXL4	SERPINB9P1	0.926765358	1.47E-05	DOWN	DOWN
SLC4A4	SERPINB9P1	0.909979898	4.00E-05	DOWN	DOWN
BTN2A2	SERPINB9P1	0.900259173	6.56E-05	DOWN	DOWN
DPP4	SERPINB9P1	0.901790879	6.09E-05	DOWN	DOWN
HR	SERPINB9P1	0.900354689	6.53E-05	DOWN	DOWN
CTSS	SERPINB9P1	0.900614661	6.45E-05	DOWN	DOWN
PPP1R13L	SERPINB9P1	0.921330864	2.08E-05	DOWN	DOWN
PTPN22	SERPINB9P1	0.904111908	5.42E-05	DOWN	DOWN
KANK1	SERPINB9P1	0.911574065	3.66E-05	DOWN	DOWN
WWP2	SERPINB9P1	0.905556752	5.04E-05	DOWN	DOWN
MXRA5	SERPINB9P1	0.911884581	3.60E-05	DOWN	DOWN
KCND2	SERPINB9P1	0.913391349	3.31E-05	DOWN	DOWN
EHD4	SERPINB9P1	0.912552806	3.47E-05	DOWN	DOWN
KIAA1755	SERPINB9P1	0.965267934	3.75E-07	DOWN	DOWN
PLK2	SERPINB9P1	0.901228384	6.26E-05	DOWN	DOWN
CACNB4	SERPINB9P1	0.912600386	3.46E-05	DOWN	DOWN
PTGIR	SERPINB9P1	0.929027534	1.26E-05	DOWN	DOWN
FKBP5	SH3RF3-AS1	0.922228014	1.96E-05	UP	UP
CPM	SH3RF3-AS1	0.906623889	4.77E-05	UP	UP
MT1X	SH3RF3-AS1	0.937500143	6.76E-06	UP	UP
NFIL3	SH3RF3-AS1	0.902822941	5.79E-05	UP	UP
TSC22D3	SH3RF3-AS1	0.93742466	6.80E-06	UP	UP
NEFL	SH3RF3-AS1	0.930037888	1.17E-05	UP	UP
SH3RF3	SH3RF3-AS1	0.962788725	5.28E-07	UP	UP
DDIT4	SH3RF3-AS1	0.908619514	4.30E-05	UP	UP
RASL11B	SH3RF3-AS1	0.904222899	5.39E-05	UP	UP
CRLF1	SH3RF3-AS1	0.922412953	1.94E-05	UP	UP
MT1G	SH3RF3-AS1	0.930044103	1.17E-05	UP	UP
MT1M	SH3RF3-AS1	0.944882785	3.65E-06	UP	UP
PID1	SH3RF3-AS1	0.921320395	2.08E-05	UP	UP
MSX1	SNHG9	0.90985956	4.02E-05	UP	UP
PEX11G	SNHG9	0.926176024	1.52E-05	UP	UP
EPOP	SNHG9	0.918732242	2.43E-05	UP	UP
P2RY11	SNHG9	0.934610218	8.43E-06	UP	UP
RNF144A	SNHG9	0.905467022	5.06E-05	UP	UP
ACSL1	SNHG9	0.922222111	1.97E-05	UP	UP
TRIM35	SNHG9	0.91043503	3.90E-05	UP	UP
ASTN2	SNHG9	0.912535761	3.48E-05	UP	UP
IFNGR1	SNHG9	0.902797479	5.79E-05	UP	UP
G0S2	SNHG9	0.919721247	2.29E-05	UP	UP
PKDCC	SNHG9	0.910531339	3.88E-05	UP	UP
COL18A1	SNHG9	0.92517822	1.63E-05	UP	UP
FITM2	SNHG9	0.91934345	2.35E-05	UP	UP
ACKR3	SNHG9	0.929824538	1.19E-05	UP	UP
DCXR	SNHG9	0.910230243	3.94E-05	UP	UP
SMIM3	SNHG9	0.94219326	4.61E-06	UP	UP
LY6G5C	UBAC2-AS1	0.955606425	1.26E-06	UP	UP
SESN2	UBAC2-AS1	0.922325493	1.95E-05	UP	UP
PCDHB5	UBAC2-AS1	0.926989409	1.44E-05	UP	UP
IGFLR1	UBAC2-AS1	0.922761715	1.90E-05	UP	UP
