# Supplementary material for: Crucial lncRNAs associated with adipocyte differentiation from human adipose-derived stem cells based on co-expression and ceRNA network analyses
Source: PeerJ. 2019 Sep 6;7:e7544. doi: 10.7717/peerj.7544 (PMC6733242; doi:10.7717/peerj.7544)
Supplement: Supplemental Information 5 [file peerj-07-7544-s005.xlsx]

## Sheet: Sheet1
Category	Term	Count	%	PValue	Genes	List Total	Pop Hits	Pop Total	Fold Enrichment	Bonferroni	Benjamini	FDR
GOTERM_BP_DIRECT	GO:0042981~regulation of apoptotic process	7	0.0717949	6.03522e-05	RASSF5, TNFRSF11B, DUSP1, NTF3, FYN, GDF5, ESR1	55	213	16792	10.0336	0.0460428	0.0460428	0.0923084
GOTERM_BP_DIRECT	GO:0032148~activation of protein kinase B activity	4	0.0410256	7.75639e-05	WNT5A, NTF3, FGF1, NRG1	55	26	16792	46.9706	0.0587813	0.0298358	0.118619
GOTERM_BP_DIRECT	GO:0007596~blood coagulation	6	0.0615385	0.000306272	PRKAR2B, FYN, GATA6, ITGA2, PDGFD, PLAU	55	184	16792	9.95573	0.21277	0.0766483	0.467619
GOTERM_BP_DIRECT	GO:0071560~cellular response to transforming growth factor beta stimulus	4	0.0410256	0.000521639	WNT5A, FYN, SOX5, PDGFD	55	49	16792	24.9232	0.334693	0.096859	0.795218
GOTERM_BP_DIRECT	GO:0043066~negative regulation of apoptotic process	8	0.0820513	0.000603378	WNT5A, EDNRB, DUSP1, RPS6KA1, ID1, GATA6, FOXO1, PIK3R1	55	455	16792	5.36807	0.37586	0.0899685	0.91929
GOTERM_BP_DIRECT	GO:0045944~positive regulation of transcription from RNA polymerase II promoter	11	0.112821	0.00100897	KLF5, WNT5A, RPS6KA1, GATA6, HIPK2, TFEB, ESR1, FOXO1, FGF1, NRG1, PIK3R1	55	981	16792	3.42345	0.54543	0.123133	1.53279
GOTERM_BP_DIRECT	GO:0045893~positive regulation of transcription, DNA-templated	8	0.0820513	0.00124552	KLF5, WNT5A, GATA6, HIPK2, TFEB, ESR1, FOXO1, LGR4	55	515	16792	4.74267	0.622187	0.129816	1.88896
GOTERM_BP_DIRECT	GO:0018108~peptidyl-tyrosine phosphorylation	5	0.0512821	0.00147105	EPHA4, FYN, FGF1, NRG1, EPHA2	55	153	16792	9.97742	0.683279	0.133867	2.22741
GOTERM_BP_DIRECT	GO:0014066~regulation of phosphatidylinositol 3-kinase signaling	4	0.0410256	0.00201694	FYN, FGF1, NRG1, PIK3R1	55	78	16792	15.6569	0.793369	0.160713	3.04212
GOTERM_BP_DIRECT	GO:0030335~positive regulation of cell migration	5	0.0512821	0.00287886	NTF3, PDGFD, FGF1, PIK3R1, PLAU	55	184	16792	8.29644	0.894773	0.201614	4.31557
GOTERM_BP_DIRECT	GO:0046854~phosphatidylinositol phosphorylation	4	0.0410256	0.00342757	FYN, FGF1, NRG1, PIK3R1	55	94	16792	12.9919	0.931542	0.216337	5.11811
GOTERM_BP_DIRECT	GO:0030182~neuron differentiation	4	0.0410256	0.00353136	WNT5A, ID1, HIPK2, EPHA2	55	95	16792	12.8551	0.93689	0.205657	5.26919
GOTERM_BP_DIRECT	GO:0008284~positive regulation of cell proliferation	7	0.0717949	0.00370147	KLF5, EDNRB, NTF3, HIPK2, PDGFD, FGF1, NRG1	55	466	16792	4.58619	0.944768	0.199714	5.51635
GOTERM_BP_DIRECT	GO:0048015~phosphatidylinositol-mediated signaling	4	0.0410256	0.00480127	FYN, FGF1, NRG1, PIK3R1	55	106	16792	11.5211	0.976689	0.235465	7.09975
GOTERM_BP_DIRECT	GO:0000187~activation of MAPK activity	4	0.0410256	0.00492864	WNT5A, NTF3, FGF1, NRG1	55	107	16792	11.4134	0.978906	0.226827	7.28151
GOTERM_BP_DIRECT	GO:0045892~negative regulation of transcription, DNA-templated	7	0.0717949	0.00515884	WNT5A, ID1, GATA6, FOXO1, NRG1, ZBTB18, LGR4	55	499	16792	4.28289	0.982393	0.223119	7.60918
GOTERM_BP_DIRECT	GO:0045766~positive regulation of angiogenesis	4	0.0410256	0.00602142	WNT5A, GATA6, HIPK2, FGF1	55	115	16792	10.6194	0.991058	0.2423	8.82738
GOTERM_BP_DIRECT	GO:0000122~negative regulation of transcription from RNA polymerase II promoter	8	0.0820513	0.00794164	KLF5, EDNRB, ID1, GATA6, HIPK2, ESR1, FOXO1, ZBTB18	55	720	16792	3.39232	0.998025	0.292455	11.4856
GOTERM_BP_DIRECT	GO:0043524~negative regulation of neuron apoptotic process	4	0.0410256	0.0087941	NTF3, FYN, GDF5, HIPK2	55	132	16792	9.25179	0.998991	0.304471	12.6423
GOTERM_BP_DIRECT	GO:0035556~intracellular signal transduction	6	0.0615385	0.00936805	PRKAR2B, RASSF5, DUSP1, RPS6KA1, FYN, NRG1	55	403	16792	4.54554	0.999358	0.307569	13.4131
GOTERM_BP_DIRECT	GO:0045213~neurotransmitter receptor metabolic process	2	0.0205128	0.00961703	DMD, NRG1	55	3	16792	203.539	0.999472	0.3019	13.7455
GOTERM_BP_DIRECT	GO:0060750~epithelial cell proliferation involved in mammary gland duct elongation	2	0.0205128	0.0128025	WNT5A, ESR1	55	4	16792	152.655	0.999957	0.367087	17.8943
GOTERM_BP_DIRECT	GO:0048146~positive regulation of fibroblast proliferation	3	0.0307692	0.013053	WNT5A, ESR1, PDGFD	55	54	16792	16.9616	0.999965	0.359915	18.2126
GOTERM_BP_DIRECT	GO:0043406~positive regulation of MAP kinase activity	3	0.0307692	0.0154485	PDE5A, PDGFD, FGF1	55	59	16792	15.5242	0.999995	0.397486	21.198
GOTERM_BP_DIRECT	GO:0043627~response to estrogen	3	0.0307692	0.0185517	TNFRSF11B, GATA6, ESR1	55	65	16792	14.0912	1	0.442894	24.9141
GOTERM_BP_DIRECT	GO:0014068~positive regulation of phosphatidylinositol 3-kinase signaling	3	0.0307692	0.0185517	FYN, PDGFD, NRG1	55	65	16792	14.0912	1	0.442894	24.9141
GOTERM_BP_DIRECT	GO:0048841~regulation of axon extension involved in axon guidance	2	0.0205128	0.0222987	PLXNA4, PLXNA2	55	7	16792	87.2312	1	0.492063	29.1826
GOTERM_BP_DIRECT	GO:0008366~axon ensheathment	2	0.0205128	0.0222987	NRG1, MBP	55	7	16792	87.2312	1	0.492063	29.1826
GOTERM_BP_DIRECT	GO:0050966~detection of mechanical stimulus involved in sensory perception of pain	2	0.0205128	0.0254441	FYN, ITGA2	55	8	16792	76.3273	1	0.525512	32.5897
GOTERM_BP_DIRECT	GO:0008286~insulin receptor signaling pathway	3	0.0307692	0.0260846	PDK4, FOXO1, PIK3R1	55	78	16792	11.7427	1	0.521564	33.2645
GOTERM_BP_DIRECT	GO:0090630~activation of GTPase activity	3	0.0307692	0.0267078	WNT5A, NTF3, EPHA2	55	79	16792	11.594	1	0.517632	33.9149
GOTERM_BP_DIRECT	GO:0060068~vagina development	2	0.0205128	0.0285796	WNT5A, ESR1	55	9	16792	67.8465	1	0.529924	35.8331
GOTERM_BP_DIRECT	GO:0021785~branchiomotor neuron axon guidance	2	0.0205128	0.0285796	PLXNA4, PLXNA2	55	9	16792	67.8465	1	0.529924	35.8331
GOTERM_BP_DIRECT	GO:0007165~signal transduction	9	0.0923077	0.0311102	TNFRSF11B, NTF3, RPS6KA1, PDE5A, NR3C2, ESR1, FGF1, PIK3R1, PLAU	55	1161	16792	2.36674	1	0.548972	38.3438
GOTERM_BP_DIRECT	GO:0048013~ephrin receptor signaling pathway	3	0.0307692	0.0312364	EPHA4, FYN, EPHA2	55	86	16792	10.6503	1	0.539077	38.4666
GOTERM_BP_DIRECT	GO:0031643~positive regulation of myelination	2	0.0205128	0.0317051	WASF3, NRG1	55	10	16792	61.0618	1	0.533505	38.9206
GOTERM_BP_DIRECT	GO:0010976~positive regulation of neuron projection development	3	0.0307692	0.033264	WNT5A, FYN, DMD	55	89	16792	10.2913	1	0.540258	40.408
GOTERM_BP_DIRECT	GO:1901653~cellular response to peptide	2	0.0205128	0.0348209	KLF5, ID1	55	11	16792	55.5107	1	0.546542	41.8597
GOTERM_BP_DIRECT	GO:0046849~bone remodeling	2	0.0205128	0.0348209	LGR4, EPHA2	55	11	16792	55.5107	1	0.546542	41.8597
GOTERM_BP_DIRECT	GO:0033628~regulation of cell adhesion mediated by integrin	2	0.0205128	0.0348209	EPHA2, PLAU	55	11	16792	55.5107	1	0.546542	41.8597
GOTERM_BP_DIRECT	GO:0001525~angiogenesis	4	0.0410256	0.0349227	KLF5, PTPRB, ID1, FGF1	55	223	16792	5.4764	1	0.53753	41.9535
GOTERM_BP_DIRECT	GO:0007179~transforming growth factor beta receptor signaling pathway	3	0.0307692	0.0353419	ID1, GDF5, HIPK2	55	92	16792	9.95573	1	0.532101	42.3381
GOTERM_BP_DIRECT	GO:0008584~male gonad development	3	0.0307692	0.0367547	WNT5A, GATA6, ESR1	55	94	16792	9.74391	1	0.536819	43.6168
GOTERM_BP_DIRECT	GO:1902287~semaphorin-plexin signaling pathway involved in axon guidance	2	0.0205128	0.0379267	PLXNA4, PLXNA2	55	12	16792	50.8848	1	0.538967	44.6575
GOTERM_BP_DIRECT	GO:0055119~relaxation of cardiac muscle	2	0.0205128	0.0379267	RGS2, PDE5A	55	12	16792	50.8848	1	0.538967	44.6575
GOTERM_BP_DIRECT	GO:0007169~transmembrane receptor protein tyrosine kinase signaling pathway	3	0.0307692	0.038189	NTF3, FYN, NRG1	55	96	16792	9.54091	1	0.532451	44.8879
GOTERM_BP_DIRECT	GO:0001678~cellular glucose homeostasis	2	0.0205128	0.0441091	FOXO1, PIK3R1	55	14	16792	43.6156	1	0.576549	49.8562
GOTERM_BP_DIRECT	GO:0060065~uterus development	2	0.0205128	0.0441091	WNT5A, ESR1	55	14	16792	43.6156	1	0.576549	49.8562
GOTERM_BP_DIRECT	GO:0006636~unsaturated fatty acid biosynthetic process	2	0.0205128	0.0471856	ELOVL2, SCD5	55	15	16792	40.7079	1	0.592944	52.2697
